# Supplementary material
Source: PubMed Central journal article supplement (PMC4123539)
Supplement: NIHMS608081-supplement-Supporting_Information.pdf [file NIHMS608081-supplement-Supporting_Information.pdf]

# Electronic Supplementary Information

## Rational Design, Synthesis and Evaluation of Tetrahydroxamic Acid Chelators for Stable Complexation of Zr<sup>IV</sup>

François Guérard<sup>[a]</sup>, Yong-Sok Lee<sup>[b]</sup> and Martin W. Brechbiel<sup>[a]</sup>

[a] Dr. F. Guérard, Dr. M.W. Brechbiel. Radioimmune & Inorganic Chemistry Section, Radiation Oncology Branch, National Cancer Institute, National Institutes of Health, Bethesda, Maryland 20892, USA

[b] Dr. Y.-S. Lee. Center for Molecular Modeling, Division of Computational Bioscience. Center for Information Technology, National Institutes of Health Bethesda, Maryland 20892, USA

### 1. Syntheses

All reagents and solvents were obtained commercially and used without further purification unless otherwise noted. *N*-Boc-*O*-benzylhydroxylamine was prepared as previously reported.<sup>1</sup> <sup>1</sup>H NMR and <sup>13</sup>C NMR spectra were recorded on a Bruker Advance 300 MHz instrument, and chemical shifts are reported in ppm on the  $\delta$  scale relative to TMS. Electrospray ionization-mass spectra (ESI-MS) were acquired using an Agilent LC/MS system equipped with a multimode ion. Elemental analyses were performed by Galbraith Lab. Inc. (Knoxville, TN) using combustion analysis methods for C, H, and N and inductively coupled plasma-atomic emission spectroscopy (ICP-OES) method for Zr. FT-IR spectra were recorded on a MIRacle™ Single Reflection ATR spectrometer (PIKE technologies, Madison, WI).

#### *N*-alkylated-*N*-Boc-*O*-benzylhydroxylamines 1a-c.

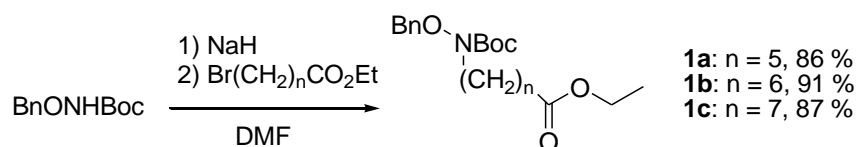

<sup>1</sup> A. Safavy, D. C. Smith, A. Bazooband, D. J. Buchsbaum, *Bioconjugate Chem.* **2002**, *13*, 327–332.

*N*-Boc-*O*-benzylhydroxylamine (5.00 g, 22.4 mmol) under nitrogen atmosphere was dissolved in dry DMF (100 mL) and cooled in an ice bath. 60% sodium hydride (887 mg, 22.2 mmol) was added and the mixture was stirred until end of hydrogen evolution (~ 30 min). Ethyl-6-bromohexanoate (6.19 g, 28 mmol) was added and the mixture was heated for 14 h at 65 °C. The DMF was then evaporated in vacuo, the residue was dissolved in AcOEt and washed twice with water. After drying the organic layer with MgSO<sub>4</sub>, the oil obtained after filtration and concentration was purified by flash chromatography using hexane/acetone (9/1), affording **1a** as a colorless oil (7.04 g, 86%). <sup>1</sup>H NMR (CDCl<sub>3</sub>, 300 MHz, ppm): δ 1.24 (t, 3H, *J* = 7.2 Hz), 1.31 (m, 2H), 1.50 (s, 9H), 1.61 (m, 4H), 2.28 (t, 2H, *J* = 7.5 Hz), 3.40 (t, 2H, *J* = 7.2 Hz), 4.11 (q, 2H, *J* = 7.2 Hz), 4.82 (s, 2H), 7.36 (m, 5H). <sup>13</sup>C NMR (CDCl<sub>3</sub>, 75 MHz, ppm): δ 14.4, 24.8, 26.5, 26.9, 28.5, 34.4, 49.6, 60.4, 77.1, 81.4, 128.6(2), 129.5, 135.9, 156.8, 173.8. ESI-MS: *m/z* = 266.2 [M+H]<sup>+</sup>.

The same alkylation procedure using ethyl-7-bromoheptanoate provided **1b** as a colorless oil (91%). <sup>1</sup>H NMR (CDCl<sub>3</sub>, 300 MHz, ppm): δ 1.24 (t, 3H, *J* = 7.2), 1.31 (m, 4H), 1.50 (s, 9H), 1.60 (m, 4H), 2.27 (t, 2H, *J* = 7.5 Hz), 3.40 (t, 2H, *J* = 6.9 Hz), 4.11 (q, 2H, *J* = 6.9 Hz), 4.82 (s, 2H), 7.33 (m, 5H). <sup>13</sup>C NMR (CDCl<sub>3</sub>, 75 MHz, ppm): δ 14.3, 24.9, 26.5, 26.9, 28.4, 28.8, 34.3, 49.6, 60.2, 76.9, 81.1, 128.4, 128.5, 129.4, 135.8, 156.6, 173.7. ESI-MS: *m/z* = 402.2 [M+Na]<sup>+</sup>.

The same alkylation procedure using ethyl-8-bromooctanoate provided **1c** as a colorless oil (87%). <sup>1</sup>H NMR (CDCl<sub>3</sub>, 300 MHz, ppm): δ 1.24 (t, 3H, *J* = 7.2 Hz), 1.30 (m, 6H), 1.50 (s, 9H), 1.61 (m, 4H), 2.27 (t, 2H, *J* = 7.2 Hz), 3.39 (t, 2H, *J* = 7.2 Hz), 4.11 (q, 2H, *J* = 7.2 Hz), 4.82 (s, 2H), 7.33 (m, 5H). <sup>13</sup>C NMR (CDCl<sub>3</sub>, 75 MHz, ppm): δ 14.3, 24.9, 26.6, 27.1, 28.4, 29.0, 29.1, 34.4, 49.6, 60.2, 76.9, 81.1, 128.4, 128.5, 129.4, 135.8, 156.7, 173.8. ESI-MS: *m/z* = 416.2 [M+Na]<sup>+</sup>, 294.2 [M-Boc+ 2H]<sup>+</sup>.

### Carboxylic acid building blocks 2a-c.

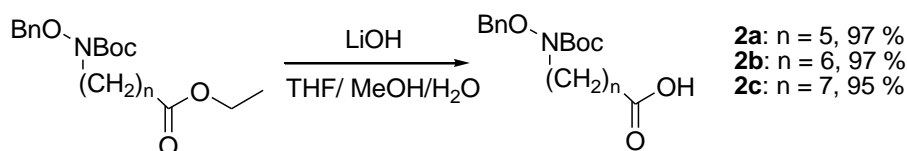

Compound **1a** (2.215 g, 6.06 mmol) was dissolved in 18 ml THF + 6 mL MeOH, and 6 mL of 2M LiOH (12 mmol) was added dropwise, and the mixture was stirred for 4 h at room temperature. After removal of the solvents in vacuo, the residue was dissolved in Et<sub>2</sub>O and washed with 1M HCl. The organic layer was dried over MgSO<sub>4</sub>, filtered, and evaporated to afford **2a** as a colorless oil (1.93 g, 97%). <sup>1</sup>H NMR (CDCl<sub>3</sub>, 300 MHz, ppm): δ 1.33 (m, 2H), 1.50 (s, 9H), 1.62 (m, 4H), 2.34 (t, 2H, *J* = 7.2 Hz), 3.41 (t, 2H, *J* = 7.2 Hz), 4.82 (s, 2H), 7.35 (m, 5H). <sup>13</sup>C NMR (CDCl<sub>3</sub>, 75 MHz, ppm): δ 24.5, 26.4, 26.9, 28.5, 34.0, 49.5, 77.1, 81.5, 128.6, 128.7, 129.6, 135.8, 156.8, 179.6. ESI-MS: *m/z* = 360.1 [M+Na]<sup>+</sup>, 238.1 [M-Boc+ 2H]<sup>+</sup>.

The same procedure starting with compound **1b** afforded **2b** as a colorless oil (97%). <sup>1</sup>H NMR (CDCl<sub>3</sub>, 300 MHz, ppm): δ 1.32 (m, 4H), 1.50 (s, 9H), 1.60 (m, 4H), 2.33 (t, 2H, *J* = 7.5 Hz), 3.40 (t, 2H, *J* = 7.2 Hz), 4.82 (s, 2H), 7.35 (m, 5H). <sup>13</sup>C NMR (CDCl<sub>3</sub>, 75 MHz, ppm): δ 24.7, 26.6, 27.0, 28.5, 28.9, 34.1, 49.7, 77.1, 81.4, 128.6, 128.7, 129.6, 135.9, 156.8, 179.8. ESI-MS: *m/z* = 374.2 [M+Na]<sup>+</sup>.

The same procedure starting with compound **1c** afforded **2c** as a colorless oil (95%). <sup>1</sup>H NMR (CDCl<sub>3</sub>, 300 MHz, ppm): δ 1.34 (m, 6H), 1.50 (s, 9H), 1.60 (m, 4H), 2.33 (t, 2H, *J* = 7.5 Hz), 3.40 (t, 2H, *J* = 7.2 Hz), 4.82 (s, 2H), 7, 35 (m, 5H). <sup>13</sup>C NMR (CDCl<sub>3</sub>, 75 MHz, ppm): δ 24.9, 26.9, 27.3, 28.9, 29.2, 29.3, 34.4, 49.9, 77.9, 81.5, 128.7, 128.8, 129.7, 136.0, 157.0, 180.3. ESI-MS: *m/z* = 388.2 [M+Na]<sup>+</sup>.

### *O*-benzylhydroxylamine building blocks **3a-c**.

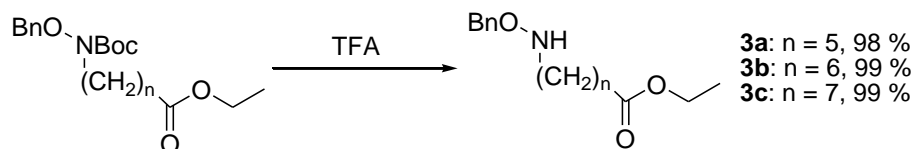

To compound **1a** (2.544 g, 6.96 mmol) cooled in an ice bath, was added dropwise trifluoroacetic acid (3.22 mL, 41.8 mmol). The mixture was stirred at room temperature for 3h. CH<sub>2</sub>Cl<sub>2</sub> (50 mL) and water (50 mL) were then added and the solution was raised to pH 10-11 by addition of solid Na<sub>2</sub>CO<sub>3</sub>. After drying the organic layer over MgSO<sub>4</sub> and filtration, the solution was concentrated in vacuo to afford **3a** as a colorless liquid (1.81 g, 98%). <sup>1</sup>H NMR (CDCl<sub>3</sub>, 300 MHz, ppm): δ 1.30 (t, 3H, *J* = 6.6 Hz), 1.37 (m, 2H), 1.53 (m, 2H), 1.63 (m, 2H), 2.29 (t, 2H, *J* = 7.5 Hz), 2.93 (t, 2H, *J* = 7.2 Hz), 4.12 (q, 2H, *J* = 7.2 Hz), 4.70 (s, 2H), 5.54 (s, 1H), 7.34 (m, 5H). <sup>13</sup>C NMR (CDCl<sub>3</sub>, 75 MHz, ppm): 14.4, 25.0, 26.9, 27.2, 34.4, 52.1, 60.4, 76.4, 128.0, 128.6(2), 138.2, 173.9. ESI-MS: *m/z* = 266.2 [M+H]<sup>+</sup>.

The same procedure starting with compound **1b** afforded **3b** as a colorless liquid (99%). <sup>1</sup>H NMR (CDCl<sub>3</sub>, 300 MHz, ppm): δ 1.24 (t, 3H, *J* = 7.2 Hz), 1.32 (m, 4H), 1.51 (m, 2H), 1.62 (m, 2H), 2.28 (t, 2H, *J* = 7.2 Hz), 2.91 (t, 2H, *J* = 6.9 Hz), 4.11 (q, 2H, *J* = 7.2 Hz), 4.69 (s, 2H), 5.53 (s, 1H) 7.31 (m, 5H). <sup>13</sup>C NMR (CDCl<sub>3</sub>, 75 MHz, ppm): δ 14.4, 25.0, 26.9, 27.3, 29.1, 34.4, 52.2, 60.3, 76.3, 127.8, 128.4, 138.1, 173.8. ESI-MS: *m/z* = 280.1 [M+H]<sup>+</sup>; 302.1 [M+Na]<sup>+</sup>.

The same procedure starting with compound **1c** afforded **3c** as a colorless liquid (99%). <sup>1</sup>H NMR (CDCl<sub>3</sub>, 300 MHz, ppm): δ 1.25 (t, 3H, *J* = 7.2 Hz), 1.31 (m, 6H), 1.48 (m, 2H), 1.61 (m, 2H), 2.28 (t, 2H, *J* = 7.5 Hz), 2.92 (t, 2H, *J* = 7.2 Hz), 4.12 (q, 2H, *J* = 7.2 Hz), 4.70 (s, 2H), 5.53 (s, 1H), 7.35 (m, 5H). <sup>13</sup>C NMR (CDCl<sub>3</sub>, 75 MHz, ppm): δ 14.5, 25.1, 27.2, 27.5, 29.2, 29.3, 34.5, 52.3, 60.4, 76.4, 128.0, 128.5, 128.6, 138.2, 174.0. ESI-MS: *m/z* = 294.2 [M+H]<sup>+</sup>.

### *O*-benzyl monohydroxamates **4a-c**.

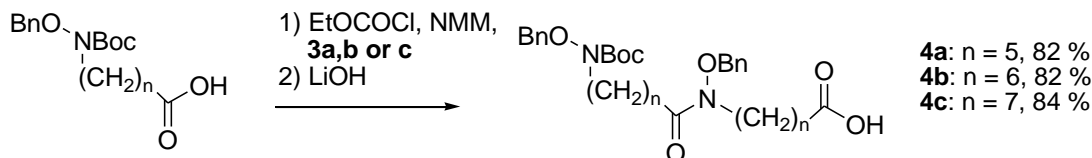

To compound **2a** (4.213 g, 12.5 mmol) dissolved in dry Et<sub>2</sub>O (100 mL) and cooled in an ice bath, was slowly added ethylchloroformate (1.43 mL, 15 mmol), followed by *N*-methylmorpholine (2.06 mL, 18.8 mol). The mixture was stirred for 15 min and the precipitate was removed by filtration. The filtrate was then poured onto compound **3a** and the mixture stirred at rt for 4 h. The solution was then washed twice with 1N HCl and twice with 1M

Na<sub>2</sub>CO<sub>3</sub>. After drying over MgSO<sub>4</sub> and concentration in vacuo, the oily residue was purified by flash chromatography using hexane/acetone (9/1) to afford the ester intermediate as a colorless oil (5.763 g, 83%). It was treated with LiOH with the hydrolysis procedure described above to afford **4a** as a colorless oil (5.70 g, 82% from **2a**). <sup>1</sup>H NMR (CDCl<sub>3</sub>, 300 MHz, ppm): δ 1.30 (m, 4H), 1.49 (s, 9H), 1.62 (m, 8H), 2.35 (m, 4H), 3.41 (t, 2H, *J* = 6.9 Hz), 3.64 (t, 2H, *J* = 6.9 Hz), 4.77 (s, 2H), 4.81 (s, 2H), 7.36 (m, 10H). <sup>13</sup>C NMR (CDCl<sub>3</sub>, 75 MHz, ppm): δ 24.5, 26.3, 26.7, 27.0, 28.5, 31.1, 32.4, 34.0, 76.4, 77.0, 81.4, 128.5, 128.6, 128.9, 129.1, 129.3, 129.5, 134.7, 135.7, 156.8, 178.6. ESI-MS: *m/z* = 579.3 [M+Na]<sup>+</sup>; 457.3 [M-Boc+2H]<sup>+</sup>.

The same condensation procedure between **2b** and **3b**, followed by ester hydrolysis afforded compound **4b** as a colorless oil (82%). <sup>1</sup>H NMR (CDCl<sub>3</sub>, 300 MHz, ppm): δ 1.30 (m, 8H), 1.49 (s, 9H), 1.60 (m, 8H), 2.32 (m, 4H), 3.39 (t, 2H, *J* = 7.2 Hz), 3.61 (t, 2H, *J* = 6.9 Hz), 4.79 (s, 2H), 4.81 (s, 2H), 7.34 (m, 10H). <sup>13</sup>C NMR (CDCl<sub>3</sub>, 75 MHz, ppm): δ 24.7, 25.7, 26.5, 26.7, 26.8, 27.11, 28.5, 28.8, 29.3, 32.5, 34.1, 49.7, 53.6, 76.4, 77.0, 81.3, 128.5, 128.6, 128.9, 129.1, 129.2, 129.5, 134.7, 135.8, 156.8, 179.1. ESI-MS: *m/z* = 607.3 [M+Na]<sup>+</sup>; 485.3 [M-Boc+2H]<sup>+</sup>.

The same condensation procedure between **2c** and **3c**, followed by ester hydrolysis afforded compound **4c** as a colorless oil (82%). <sup>1</sup>H NMR (CDCl<sub>3</sub>, 300 MHz, ppm): δ 1.30 (m, 12H), 1.49 (s, 9H), 1.60 (m, 8H), 2.34 (m, 4H), 3.39 (t, 2H, *J* = 7.2 Hz), 3.62 (t, 2H, *J* = 6.9 Hz), 4.79 (s, 2H), 4.81 (s, 2H), 7.34 (m, 10H). <sup>13</sup>C NMR (CDCl<sub>3</sub>, 75 MHz, ppm): δ 24.8, 26.7, 26.8, 27.0, 27.2, 28.5, 29.0, 29.1, 29.3, 29.5, 32.6, 34.1, 49.8, 76.5, 77.1, 81.4, 128.6, 128.7, 128.9, 129.1, 129.3, 129.6, 134.1, 135.9, 156.8, 178.9. ESI-MS: *m/z* = 635.3 [M+Na]<sup>+</sup>; 513.3 [M-Boc+2H]<sup>+</sup>.

### ***N*-allyl-*O*-benzylhydroxylamine **5**.**

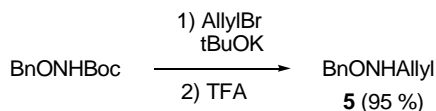

*N*-Boc-*O*-benzylhydroxylamine (2.203 g, 9.87 mmol) was melted by heating at 60 °C and, after cooling, allyl bromide (1.7 mL, 19.74 mmol) was added, followed by potassium *tert*-butoxide (1.383 g, 12.34 mmol). After heating at 60 °C for 4 h, the mixture was cooled to rt, water was added and the product was extracted by CH<sub>2</sub>Cl<sub>2</sub>, dried over MgSO<sub>4</sub>, filtered and concentrated in vacuo resulting in an oily residue. Purification by flash chromatography using hexane/acetone (95/5) afforded a colorless oil (2.554 g). To this oil was added TFA (4.53 mL, 59.2 mmol) and the mixture was stirred at rt for 4 h. It was then diluted with CH<sub>2</sub>Cl<sub>2</sub> (150 mL) and water (75 mL). Solid Na<sub>2</sub>CO<sub>3</sub> was added until pH = 10-11. The organic layer was dried over MgSO<sub>4</sub>, filtered and concentrated in vacuo to afford compound **5** as a colorless liquid (2.09 g, 95%). <sup>1</sup>H NMR (CDCl<sub>3</sub>, 300 MHz, ppm): δ 3.55 (d, 2H, *J* = 6.3 Hz), 4.72 (s, 2H), 5.20 (m, 2H), 5.55 (s, 1H), 5.94 (m, 1H), 7.35 (m, 5H). <sup>13</sup>C NMR (CDCl<sub>3</sub>, 75 MHz, ppm): δ 55.2, 76.4, 118.1, 128.0, 128.6(2), 134.5, 138.1. ESI-MS: *m/z* = 164.0 [M+H]<sup>+</sup>.

### O-benzylated dihydroxamates 6a-c.

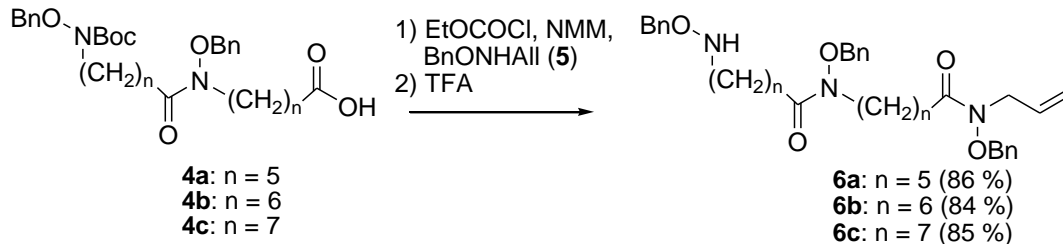

The condensation of **4a** with compound **5** was performed following the procedure described above. The oily residue was purified by flash chromatography with hexane/acetone (4/1) to afford a colorless oil. The Boc protection was then removed in the presence of TFA as described above to form **6a** as a colorless oil (3.45 g, 86%). <sup>1</sup>H NMR (CDCl<sub>3</sub>, 300 MHz, ppm): δ 1.33 (m, 4H), 1.53 (m, 2H), 1.60 (m, 6H), 2.38 (m, 4H), 2.91 (t, 2H, *J* = 7.2 Hz), 3.61 (t, 2H, *J* = 6.9 Hz), 4.23 (d, 2H, *J* = 5.7 Hz), 4.69 (s, 2H), 4.78 (s, 2H), 4.82 (s, 2H), 5.21 (m, 2H), 5.51 (s, 1H), 5.84 (m, 1H), 7.36 (m, 15H). <sup>13</sup>C NMR (CDCl<sub>3</sub>, 75 MHz, ppm): δ 24.4, 24.7, 26.8, 27.0, 27.2, 27.4, 32.4, 52.2, 76.4, 76.5, 77.0, 118.5, 127.9, 128.5, 128.8, 128.9, 129.1, 129.3, 129.4, 132.6, 134.8, 138.2, 140.3. ESI-MS: *m/z* = 602.4 [M+H]<sup>+</sup>; 624.3 [M+Na]<sup>+</sup>.

The same condensation reaction between **4b** and **5** followed by Boc removal afforded **6b** as a colorless oil (84%). <sup>1</sup>H NMR (CDCl<sub>3</sub>, 300 MHz, ppm): δ 1.30 (m, 8H), 1.47 (m, 2H), 1.61 (m, 6H), 2.37 (m, 4H), 2.93 (t, 2H, *J* = 6.9 Hz), 3.60 (t, 2H, *J* = 7.2 Hz), 4.23 (d, 2H, *J* = 6.0 Hz), 4.69 (s, 2H), 4.78 (s, 2H), 4.82 (s, 2H), 5.22 (m, 2H), 5.52 (s, 1H), 5.84 (m, 1H), 7.36 (m, 15H). <sup>13</sup>C NMR (CDCl<sub>3</sub>, 75 MHz, ppm): δ 24.5, 24.7, 26.8, 27.0, 27.2, 27.4, 29.2, 29.5, 32.5, 52.3, 76.3, 76.4, 77.0, 118.4, 127.9, 128.5(2), 128.9, 129.0, 129.1, 129.2, 129.3, 132.6, 134.7, 134.8, 138.2, 174.9. ESI-MS: *m/z* = 630.4 [M+H]<sup>+</sup>.

The same condensation reaction between **4c** and **5** followed by Boc removal afforded **6c** as a colorless oil (85%). <sup>1</sup>H NMR (CDCl<sub>3</sub>, 300 MHz, ppm): δ 1.29 (m, 12H), 1.47 (m, 2H), 1.58 (m, 6H), 2.37 (m, 4H), 2.91 (t, 2H, *J* = 6.9 Hz), 3.60 (t, 2H, *J* = 6.9 Hz), 4.24 (d, 2H, *J* = 5.7 Hz), 4.70 (s, 2H), 4.80 (s, 2H), 4.83 (s, 2H), 5.22 (m, 2H), 5.53 (s, 1H), 5.86 (m, 1H), 7.36 (m, 15H). <sup>13</sup>C NMR (CDCl<sub>3</sub>, 75 MHz, ppm): δ 24.6, 24.7, 26.8, 27.1, 27.2, 27.5, 29.2, 29.4, 29.5, 32.5, 52.3, 76.3, 76.4, 77.0, 77.4, 118.4, 127.9, 128.5(2), 128.8, 128.9, 129.0, 129.1, 129.2, 129.3, 132.6, 134.8, 138.2. ESI-MS: *m/z* = 658.4 [M+H]<sup>+</sup>; 680.4 [M+Na]<sup>+</sup>.

### O-benzyl monohydroxamates 7a-c.

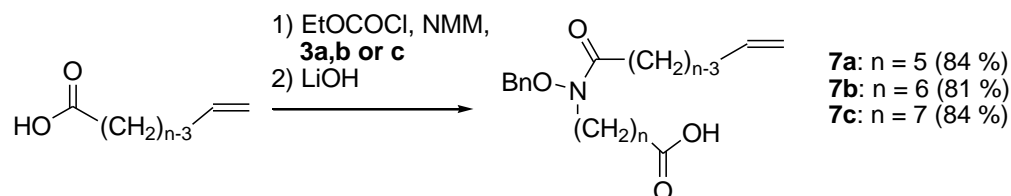

Condensation of 4-pentenoic acid with **3a** using the method described above afforded the ester intermediate as a colorless oil after purification by flash chromatography with hexane/acetone (95/5). Hydrolysis of the ester using the procedure described above afforded **7a**

as a colorless oil (84%).  $^1\text{H}$  NMR ( $\text{CDCl}_3$ , 300 MHz, ppm):  $\delta$  1.36 (m, 2H), 1.64 (m, 4H), 2.34 (m, 4H), 2.50 (m, 2H), 3.64 (m, 2H), 4.80 (s, 2H), 4.99 (m, 2H), 5.80 (m, 1H), 7.40 (m, 5H).  $^{13}\text{C}$  NMR ( $\text{CDCl}_3$ , 75 MHz, ppm):  $\delta$  24.5, 26.4, 26.7, 28.8, 31.8, 34.0, 45.4, 76.6, 115.3, 128.9, 129.2, 129.3, 134.7, 137.6, 179.2. ESI-MS:  $m/z = 320.2$   $[\text{M}+\text{H}]^+$ ;  $342.2$   $[\text{M}+\text{Na}]^+$ .

Condensation of 5-hexenoic acid with **3b** using the method described above followed by hydrolysis afforded **7b** as a colorless oil (81%).  $^1\text{H}$  NMR ( $\text{CDCl}_3$ , 300 MHz, ppm):  $\delta$  1.33 (m, 4H), 1.60 (m, 6H), 2.06 (m, 2H), 2.36 (m, 4H), 3.63 (m, 2H), 4.80 (s, 2H), 4.95 (m, 2H), 5.78 (m, 1H), 7.41 (m, 5H).  $^{13}\text{C}$  NMR ( $\text{CDCl}_3$ , 75 MHz, ppm):  $\delta$  23.9, 24.7, 26.5, 26.9, 28.8, 31.8, 33.5, 34.1, 45.6, 76.5, 115.3, 128.9, 129.1, 129.3, 134.7, 138.3, 175.0, 179.4. ESI-MS:  $m/z = 348.2$   $[\text{M}+\text{H}]^+$ ;  $370.2$   $[\text{M}+\text{Na}]^+$ .

Condensation of 6-heptenoic acid with **3c** using the method described above followed by hydrolysis afforded **7c** as a colorless oil (81%).  $^1\text{H}$  NMR ( $\text{CDCl}_3$ , 300 MHz, ppm):  $\delta$  1.31 (m, 8H), 1.61 (m, 6H), 2.04 (m, 2H), 2.35 (m, 4H), 3.62 (m, 2H), 4.80 (s, 2H), 4.95 (m, 2H), 5.78 (m, 1H), 7.37 (m, 5H).  $^{13}\text{C}$  NMR ( $\text{CDCl}_3$ , 75 MHz, ppm):  $\delta$  24.4, 24.8, 26.7, 27.0, 28.8, 29.0, 29.1, 32.4, 34.1, 76.5, 114.7, 128.9, 129.1, 129.3, 134.8, 138.8, 179.3. ESI-MS:  $m/z = 376.3$   $[\text{M}+\text{H}]^+$ ;  $398.3$   $[\text{M}+\text{Na}]^+$ .

### Acyclic *O*-benzylated tetrahydroxamates **8a-c**.

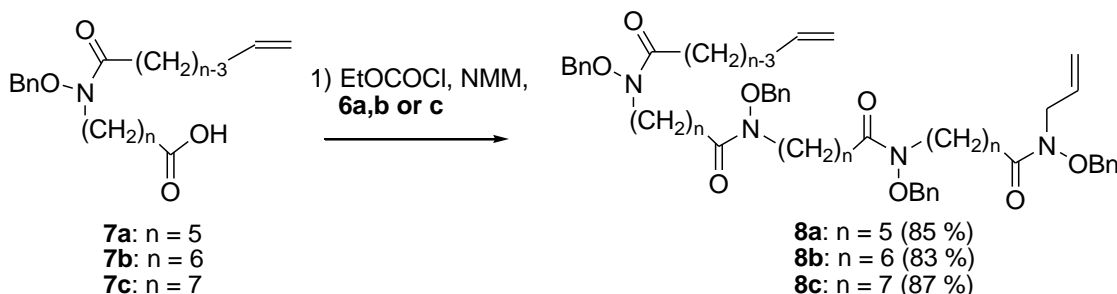

The condensation reaction between **7a** and **6a** was performed as described above. Purification by flash chromatography using hexane/acetone (7/3) afforded **8a** as a colorless oil (87%).  $^1\text{H}$  NMR ( $\text{CDCl}_3$ , 300 MHz, ppm):  $\delta$  1.29 (m, 6H), 1.61 (m, 12H), 2.36 (m, 8H), 2.47 (m, 2H), 3.60 (m, 6H), 4.77 (d, 2H,  $J = 5.7$  Hz), 4.77 (s, 4H), 4.79 (s, 2H), 4.81 (s, 2H), 4.99 (m, 2H), 5.21 (m, 2H), 5.83 (m, 2H), 7.35 (m, 20H).  $^{13}\text{C}$  NMR ( $\text{CDCl}_3$ , 75 MHz, ppm):  $\delta$  24.3, 24.4, 26.7(2), 26.9, 28.7, 31.0, 21.8, 32.3, 76.4, 76.8, 115.2, 118.4, 128.8(2), 129.0(2), 129.2, 129.3, 132.5, 134.7, 137.6, 174.7. ESI-MS:  $m/z = 903.5$   $[\text{M}+\text{H}]^+$ ;  $925.5$   $[\text{M}+\text{Na}]^+$ .

The condensation reaction between **7b** and **6b** as described above afforded **8b** as a colorless oil (83%).  $^1\text{H}$  NMR ( $\text{CDCl}_3$ , 300 MHz, ppm):  $\delta$  1.29 (m, 12H), 1.60 (m, 14H), 2.05 (m, 2H), 2.37 (m, 4H), 3.60 (m, 6H), 4.23 (d, 2H,  $J = 6.0$  Hz), 4.78 (s, 6H), 4.82 (s, 2H), 4.97 (m, 2H), 5.22 (m, 2H), 5.80 (m, 2H), 7.36 (m, 20H).  $^{13}\text{C}$  NMR ( $\text{CDCl}_3$ , 75 MHz, ppm):  $\delta$  23.8, 24.4, 24.6, 26.7, 26.9, 29.1, 31.0, 31.8, 32.4, 33.4, 45.5, 76.3, 76.9, 115.2, 118.4, 128.8, 128.9, 129.0, 129.2(2), 129.3, 132.5, 134.7, 138.3, 174.9. ESI-MS:  $m/z = 959.5$   $[\text{M}+\text{H}]^+$ ;  $971.5$   $[\text{M}+\text{Na}]^+$ .

The condensation reaction between **7c** and **6c** as described above afforded **8c** as a colorless oil (87%).  $^1\text{H}$  NMR ( $\text{CDCl}_3$ , 300 MHz, ppm):  $\delta$  1.28 (m, 18H), 1.38 (m, 2H), 1.59 (m, 14H), 2.06 (m, 2H), 2.37 (m, 8H), 3.60 (m, 6H), 4.24 (d, 2H,  $J = 6.0$  Hz), 4.79 (s, 6H), 4.83 (s, 2H), 4.94 (m, 2H), 5.22 (m, 2H), 5.84 (m, 2H), 7.37 (m, 20H).  $^{13}\text{C}$  NMR ( $\text{CDCl}_3$ , 75 MHz,

ppm):  $\delta$  24.3, 24.6, 24.7, 26.8, 27.1, 28.8, 29.3, 29.4, 29.5, 32.4, 32.5, 33.7, 45.6, 76.4, 76.9, 114.6, 118.4, 128.8, 129.0(2), 129.2, 129.3, 132.6, 134.8, 138.8, 175.1. ESI-MS:  $m/z = 1015.5$   $[M+H]^+$ ;  $1037.5$   $[M+Na]^+$ .

### Acyclic tetrahydroxamic acid chelators **L5-7**.

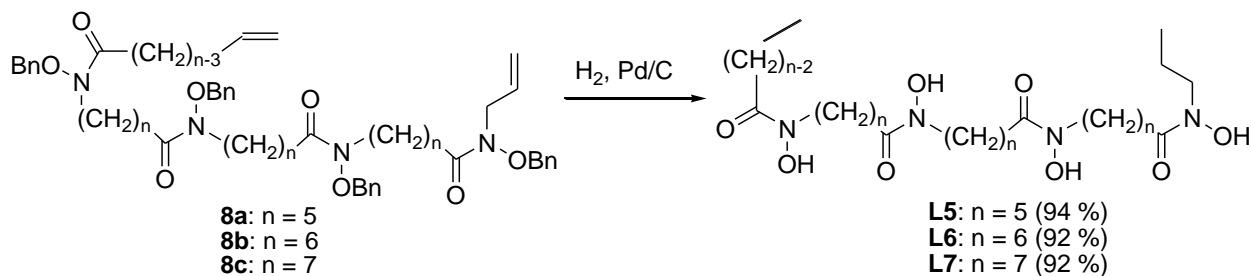

Compound **8a** (276 mg, 221  $\mu\text{mol}$ ) was dissolved in MeOH (20 mL) and hydrogenated in a Paar apparatus at 30 psi  $\text{H}_2$  in the presence of 10% Pd/C (20 mg) for 48 h. Pd/C was then removed by centrifugation at 8500 rpm. The supernatant was then centrifuged a second time and the solvent evaporated. The oily residue was dissolved in the minimum amount of MeOH,  $\text{Et}_2\text{O}$  was added until the solution became cloudy and placed in the fridge at 4  $^\circ\text{C}$ . **L5** precipitated as a white solid that was filtered and washed with  $\text{Et}_2\text{O}$  (187 mg, 94%).  $^1\text{H}$  NMR (DMSO, 300 MHz, ppm):  $\delta$  0.87 (m, 6H), 1.23 (m, 8H), 1.51 (m, 16H), 2.33 (m, 8H), 3.46 (m, 8H), 9.54 (s, 4H).  $^{13}\text{C}$  NMR (DMSO, 75 MHz, ppm):  $\delta$  11.1, 13.8, 21.9, 23.9, 25.9, 26.2, 31.4, 31.6, 47.0, 172.5. ESI-MS:  $m/z = 547.3$   $[M+H]^+$ ; 569.2  $[M+Na]^+$ ; 545.2  $[M-H]^-$ ; 581.2  $[M+Cl]^-$ . Elemental analyses: Calculated for  $\text{C}_{26}\text{H}_{50}\text{N}_4\text{O}_8$ : C, 57.12; H, 9.22; N, 10.25%. Found: C, 56.14; H, 8.74; N, 9.85. Mp: 117  $^\circ\text{C}$ .

Compound **8b** was hydrogenated using the same procedure. A white precipitate formed. It was dissolved in hot isopropyl alcohol. Pd/C was then removed by centrifugation at 8500 rpm. The supernatant was centrifuged a second time and the solvent evaporated to form **L6** as a white solid (92 %).  $^1\text{H}$  NMR (DMSO, 300 MHz, ppm):  $\delta$  0.84 (m, 6H), 1.24 (m, 16H), 1.48 (m, 16H), 2.32 (m, 8H), 3.44 (m, 8H), 9.53 (s, 4H).  $^{13}\text{C}$  NMR (DMSO, 75 MHz, ppm):  $\delta$  11.1, 13.9, 19.6, 21.9, 23.9, 24.2, 26.0, 26.2, 28.5, 31.0, 31.6, 47.0, 172.6. ESI-MS:  $m/z = 603.2$   $[M+H]^+$ ; 625.3  $[M+Na]^+$ ; 601.3  $[M-H]^-$ ; 637.3  $[M+Cl]^-$ . Elemental analyses: Calculated for  $\text{C}_{30}\text{H}_{58}\text{N}_4\text{O}_8$ : C, 59.77; H, 9.70; N, 9.29%. Found: C, 59.82; H, 9.43; N, 8.99. Mp: 139  $^\circ\text{C}$ .

Compound **8c** was hydrogenated using the same procedure. A white precipitate formed. It was dissolved in hot isopropyl alcohol. Pd/C was then removed by centrifugation at 8500 rpm. The supernatant was centrifuged a second time and the solvent evaporated to form **L7** as a white solid (92%).  $^1\text{H}$  NMR (DMSO, 300 MHz, ppm):  $\delta$  0.83 (m, 6H), 1.24 (m, 24H), 1.47 (m, 16H), 2.31 (m, 8H), 3.45 (m, 8H), 9.54 (ms, 4H).  $^{13}\text{C}$  NMR (DMSO, 75 MHz, ppm):  $\delta$  11.1, 13.9, 19.6, 22.0, 24.2, 26.0, 26.3, 28.5, 28.6, 28.8, 31.1, 31.7, 47.0, 172.6. ESI-MS:  $m/z = 659.4$   $[M+H]^+$ ; 681.4  $[M+Na]^+$ ; 657.4  $[M-H]^-$ ; 693.3  $[M+Cl]^-$ . Elemental analyses: Calculated for  $\text{C}_{34}\text{H}_{66}\text{N}_4\text{O}_8$ : C, 61.98; H, 10.10; N, 8.50%. Found: C, 61.69; H, 9.79; N, 8.27. Mp: 122  $^\circ\text{C}$ .

## Macrocyclic *O*-benzylated tetrahydroxamates **9a-c**.

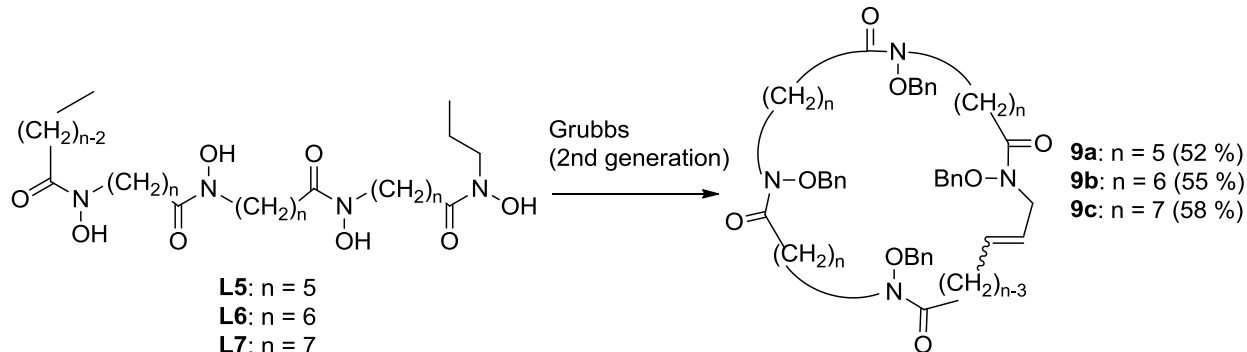

Compound **8a** (990 mg, 1.10 mmol) was dissolved in  $\text{CH}_2\text{Cl}_2$  (1000 mL) and degassed by bubbling nitrogen in the solution for 20 minutes. Grubbs catalyst, 2<sup>nd</sup> generation (279 mg, 329  $\mu\text{mol}$ ) was then added and the mixture was refluxed for 15 h. The solvent volume was then reduced to  $\sim 200$  mL in vacuo, cysteine (2.0 g, 16.5 mmol) and sodium hydroxide (2.63 g, 66 mmol) in water (100 mL) were added and the biphasic mixture was stirred for 20 h at 50  $^\circ\text{C}$ . The organic layer was dried over  $\text{MgSO}_4$ , filtered and evaporated. The dark residue obtained was extracted with boiling hexane (3 times). Evaporation of the hexane afforded a lightly red oil which was purified by flash chromatography using hexane/acetone (7/3 followed by 6/4) to afford a golden oil of **9a** as a 85/15 mixture of *Z/E* isomers (502 mg, 52%).  $^1\text{H}$  NMR ( $\text{CDCl}_3$ , 300 MHz, ppm):  $\delta$  1.25 (m, 6H), 1.57 (m, 12H), 2.32 (m, 8H), 2.42 (m, 2H), 3.58 (m, 6H), 4.10 (d, 1.7H,  $J = 5.4$  Hz), 4.24 (d, 0.3H,  $J = 5.4$ ), 4.75 (s, 6H), 4.77 (s, 2H), 5.47 (m, 1H), 5.65 (m, 1H), 7.34 (m, 20H).  $^{13}\text{C}$  NMR ( $\text{CDCl}_3$ , 75 MHz, ppm):  $\delta$  24.3, 24.4, 24.5, 26.4, 26.5, 26.8, 27.2, 31.8, 32.3, 45.1, 76.2, 76.3, 124.8, 128.7, 128.8, 128.9(2), 129.3, 129.4, 174.8. ESI-MS:  $m/z = 875.4$   $[\text{M}+\text{H}]^+$ ;  $697.3$   $[\text{M}+\text{Na}]^+$ .

Compound **8b** was treated using the same procedure and afforded a colorless oil of **9b** (55%) as a mixture of the *Z/E* isomers (92/8).  $^1\text{H}$  NMR ( $\text{CDCl}_3$ , 300 MHz, ppm):  $\delta$  1.25 (m, 12H), 1.57 (m, 12H), 1.67 (m, 2H), 2.03 (m, 2H), 2.31 (m, 8H), 3.59 (m, 6H), 4.12 (d, 1.85H,  $J = 4.8$  Hz), 4.23 (d, 0.15H,  $J = 6.0$  Hz), 4.73 (s, 2H), 4.76 (s, 6H), 5.47 (m, 1H), 5.58 (m, 1H), 7.35 (m, 20H).  $^{13}\text{C}$  NMR ( $\text{CDCl}_3$ , 75 MHz, ppm):  $\delta$  23.9, 24.4, 24.5, 26.4, 26.5, 26.8, 29.0, 29.3, 31.0, 31.6, 31.7, 32.3, 45.2, 124.7, 128.7, 128.7, 128.8, 129.2(2), 134.2, 134.8, 174.8. ESI-MS:  $m/z = 931.4$   $[\text{M}+\text{H}]^+$ ;  $953.4$   $[\text{M}+\text{Na}]^+$ .

Compound **8c** was treated using the same procedure and afforded a colorless oil of **9c** (58%) as a mixture of the *Z/E* isomers (88/12).  $^1\text{H}$  NMR ( $\text{CDCl}_3$ , 300 MHz, ppm):  $\delta$  1.26 (m, 18H), 1.37 (m, 2H), 2.04 (m, 2H), 2.34 (m, 8H), 3.59 (m, 6H), 4.13 (d, 1.76H,  $J = 5.7$  Hz), 4.23 (d, 0.24H,  $J = 6.6$  Hz), 4.77 (s, 6H), 4.79 (s, 2H), 5.46 (m, 1H), 5.60 (m, 1H), 7.36 (m, 20H).  $^{13}\text{C}$  NMR ( $\text{CDCl}_3$ , 75 MHz, ppm):  $\delta$  24.3, 24.6, 24.7, 26.6, 27.0, 28.7, 29.1(2), 29.2, 29.3, 29.4, 29.8, 32.1, 32.3, 32.5, 45.5, 76.3, 124.3, 128.7, 128.8, 128.9, 129.0, 129.2, 129.3, 134.7, 134.9, 175.0. ESI-MS:  $m/z = 988.4$   $[\text{M}+\text{H}]^+$ .



## Macrocyclic tetrahydroxamic acid chelators **C5-7**.

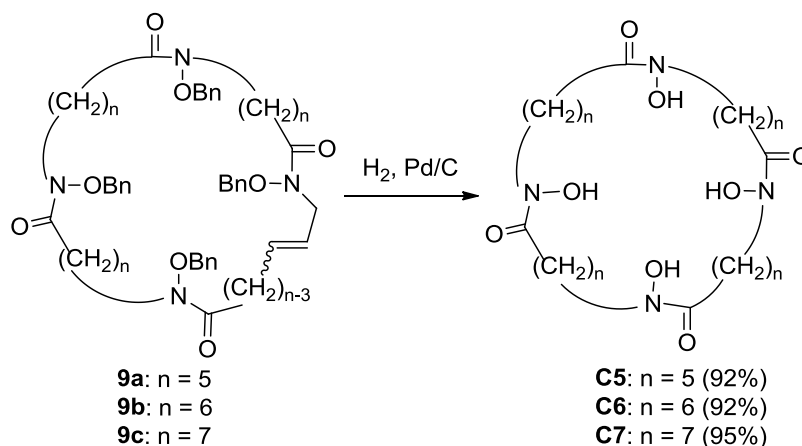

Compound **9a** (494 mg, 575  $\mu\text{mol}$ ) was dissolved in MeOH (50 mL) and hydrogenated in a Paar apparatus at 30 psi  $\text{H}_2$  in the presence of 10% Pd/C (25 mg) for 48 h. Pd/C was removed by centrifugation at 8500 rpm. The supernatant was then centrifuged a second time and the solvent evaporated. The oily residue was dissolved in the minimum amount of MeOH,  $\text{Et}_2\text{O}$  was added until the solution became cloudy and placed in the fridge at 4  $^\circ\text{C}$ . **C5** precipitated as a white solid that was filtered and washed with  $\text{Et}_2\text{O}$  (268 mg, 92%).  $^1\text{H}$  NMR (DMSO, 300 MHz, ppm):  $\delta$  1.20 (m, 8H), 1.49 (m, 16H), 2.32 (m, 8H), 3.47 (t, 8H,  $J = 6.6$  Hz), 9.50 (s, 4H).  $^{13}\text{C}$  NMR (DMSO, 75 MHz, ppm):  $\delta$  23.9, 25.7, 26.1, 31.5, 46.8, 172.5. ESI-MS:  $m/z = 517.2$   $[\text{M}+\text{H}]^+$ ; 539.2  $[\text{M}+\text{Na}]^+$ ; 515.2  $[\text{M}-\text{H}]^-$ . Elemental analyses: Calculated for  $\text{C}_{24}\text{H}_{44}\text{N}_4\text{O}_8$ : C, 55.80; H, 8.58; N, 10.84%. Found: C, 55.74; H, 8.80; N, 9.64. Mp: 150  $^\circ\text{C}$ .

Compound **9b** was hydrogenated using the same procedure. A white precipitate formed that was dissolved in hot isopropyl alcohol. The Pd/C was then removed by centrifugation at 8500 rpm. The supernatant was centrifuged a second time and the solvent evaporated to leave **C6** as a white solid (92%).  $^1\text{H}$  NMR (DMSO, 300 MHz, ppm):  $\delta$  1.23 (m, 16H), 1.49 (m, 16H), 2.31 (t, 8H,  $J = 7.2$  Hz), 3.46 (t, 8H,  $J = 6.6$  Hz), 9.52 (s, 4H).  $^{13}\text{C}$  NMR (DMSO, 75 MHz, ppm):  $\delta$  24.2, 25.8, 26.1, 28.4, 31.6, 48.9, 172.6. ESI-MS:  $m/z = 573.3$   $[\text{M}+\text{H}]^+$ ; 595.3  $[\text{M}+\text{Na}]^+$ ; 571.3  $[\text{M}-\text{H}]^-$ ; 607.2  $[\text{M}+\text{Cl}]^-$ . Elemental analyses: Calculated for  $\text{C}_{28}\text{H}_{52}\text{N}_4\text{O}_8$ : C, 58.72; H, 9.15; N, 9.78%. Found: C, 58.08; H, 8.93; N, 9.37. Mp: 167  $^\circ\text{C}$ .

Compound **9c** was hydrogenated using the same procedure. A white precipitate formed that was dissolved in hot isopropyl alcohol. The Pd/C was then removed by centrifugation at 8500 rpm. The supernatant was centrifuged a second time and the solvent evaporated to leave **C7** as a white solid (95%).  $^1\text{H}$  NMR (DMSO, 300 MHz, ppm):  $\delta$  1.24 (m, 24H), 1.48 (m, 16H), 2.32 (t, 8H,  $J = 7.2$  Hz), 3.47 (t, 8H,  $J = 6.6$  Hz), 9.51 (s, 4H).  $^{13}\text{C}$  NMR (DMSO, 75 MHz, ppm):  $\delta$  24.2, 25.9, 26.2, 28.4, 28.7, 31.6, 46.8, 172.6. ESI-MS:  $m/z = 629.3$   $[\text{M}+\text{H}]^+$ ; 651.3  $[\text{M}+\text{Na}]^+$ ; 627.2  $[\text{M}-\text{H}]^-$ ; 663.2  $[\text{M}+\text{Cl}]^-$ . Elemental analyses: Calculated for  $\text{C}_{32}\text{H}_{60}\text{N}_4\text{O}_8$ : C, 61.12; H, 9.62; N, 8.91%. Found: C, 60.96; H, 9.98; N, 8.60. Mp: 172  $^\circ\text{C}$ .

## 2. Examples of TLC obtained with $^{89}\text{Zr}$ complexes

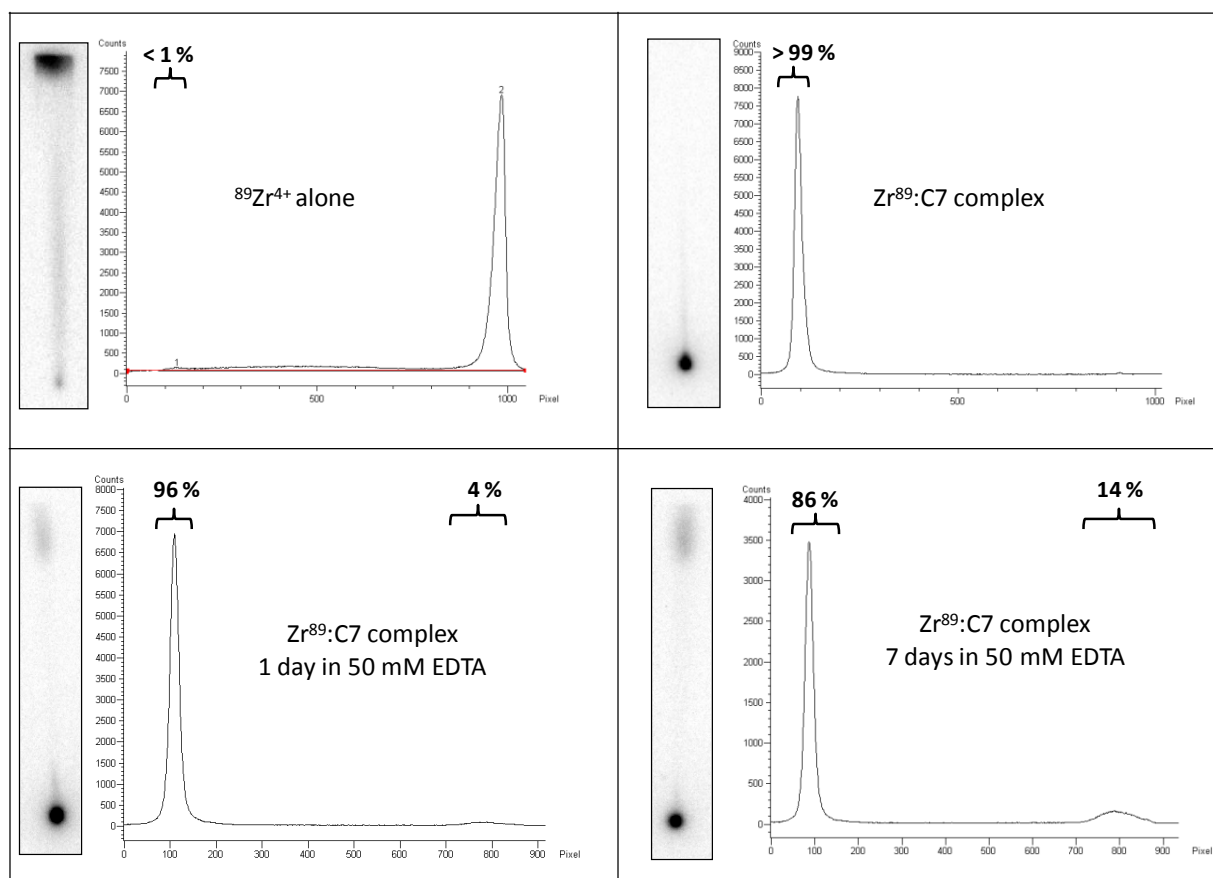

**Figure S1** : Representative radio-TLCs and corresponding chromatograms of Free  $^{89}\text{Zr}$  in water at pH 7 and its C7 complex at various times of incubation in 50 mM EDTA at 37 °C.

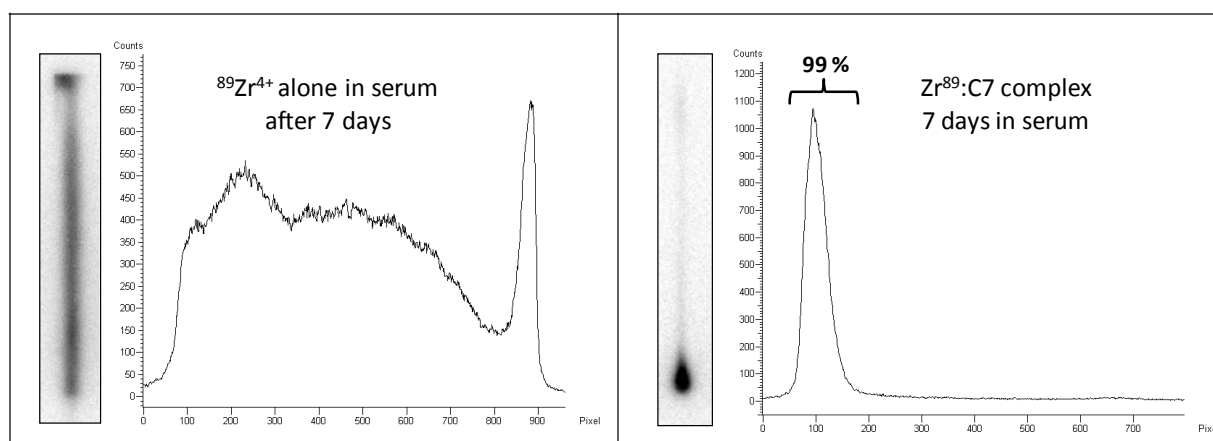

**Figure S2** : Representative radio-TLCs and corresponding chromatograms of free  $^{89}\text{Zr}$  and its C7 complex after 7 days incubation in serum at 37 °C.

### 3. Quantum Chemical Study: coordinates of free ligands and their $^{89}\text{Zr}$ complexes

**Table S1-A:** N-methyl acetohydroxamic acid (Me-AHA)

| Atom | Coordinates (Angstroms) |        |        |
|------|-------------------------|--------|--------|
|      | X                       | Y      | Z      |
| C    | -0.624                  | 0.393  | 0.987  |
| C    | 0.316                   | -0.779 | 0.982  |
| O    | -0.753                  | 1.167  | 1.943  |
| N    | -1.339                  | 0.622  | -0.148 |
| O    | -2.286                  | 1.649  | -0.049 |
| C    | -1.656                  | -0.278 | -1.219 |
| H    | -2.085                  | 1.994  | 0.856  |
| H    | -0.231                  | -1.727 | 1.049  |
| H    | 0.938                   | -0.817 | 0.081  |
| H    | 0.966                   | -0.697 | 1.855  |
| H    | -2.622                  | -0.773 | -1.049 |
| H    | -1.705                  | 0.278  | -2.161 |
| H    | -0.869                  | -1.031 | -1.294 |

**Table S1-B:**  $\text{Zr}(\text{Me-AHA})_4$

|    | Coordinates (Angstroms) |        |       |
|----|-------------------------|--------|-------|
|    | X                       | Y      | Z     |
| ZR | 15.76                   | 1.878  | 2.587 |
| C  | 15.177                  | 4.54   | 6.123 |
| H  | 14.497                  | 3.891  | 6.678 |
| H  | 14.613                  | 5.426  | 5.804 |
| H  | 15.974                  | 4.873  | 6.797 |
| O  | 15.173                  | 2.667  | 4.619 |
| N  | 16.701                  | 4.242  | 4.216 |
| C  | 15.69                   | 3.775  | 4.944 |
| O  | 17.126                  | 3.486  | 3.174 |
| C  | 17.355                  | 5.518  | 4.324 |
| H  | 18.438                  | 5.366  | 4.387 |
| H  | 17.005                  | 6.053  | 5.209 |
| H  | 17.139                  | 6.115  | 3.428 |
| C  | 17.54                   | -1.77  | 4.115 |
| H  | 17.639                  | -1.621 | 5.197 |
| H  | 18.412                  | -2.307 | 3.735 |
| H  | 16.636                  | -2.365 | 3.928 |

|   |        |        |        |
|---|--------|--------|--------|
| O | 16.388 | 0.265  | 3.929  |
| N | 17.414 | -0.492 | 3.468  |
| C | 18.109 | -0.024 | 2.435  |
| O | 17.77  | 1.086  | 1.931  |
| C | 19.269 | -0.791 | 1.881  |
| H | 19.803 | -0.142 | 1.185  |
| H | 18.929 | -1.675 | 1.327  |
| H | 19.968 | -1.127 | 2.655  |
| C | 14.082 | -2.066 | 1.093  |
| H | 13.144 | -2.119 | 0.528  |
| H | 14.029 | -2.814 | 1.893  |
| H | 14.902 | -2.334 | 0.425  |
| O | 15.413 | -0.073 | 1.346  |
| C | 14.349 | -0.691 | 1.631  |
| N | 13.463 | -0.098 | 2.426  |
| O | 13.742 | 1.156  | 2.854  |
| C | 12.204 | -0.61  | 2.9    |
| H | 11.394 | 0.052  | 2.573  |
| H | 12.213 | -0.637 | 3.995  |
| H | 12.035 | -1.617 | 2.51   |
| O | 15.962 | 2.604  | 0.563  |
| C | 15.961 | 4.374  | -0.971 |
| H | 15.569 | 5.382  | -1.125 |
| H | 15.606 | 3.714  | -1.772 |
| H | 17.056 | 4.398  | -0.999 |
| N | 15.528 | 3.86   | 0.301  |
| C | 14.765 | 4.452  | 1.214  |
| O | 14.513 | 3.832  | 2.286  |
| C | 14.221 | 5.829  | 0.968  |
| H | 13.626 | 5.886  | 0.05   |
| H | 15.021 | 6.576  | 0.89   |
| H | 13.581 | 6.097  | 1.811  |

**Table S2-A: C5**

| Atom | Coordinates (Angstroms) |        |        |
|------|-------------------------|--------|--------|
|      | X                       | Y      | Z      |
| N    | 0.804                   | -3.314 | -1.348 |
| O    | -0.453                  | -3.59  | -1.902 |

|   |        |        |        |   |        |        |        |
|---|--------|--------|--------|---|--------|--------|--------|
| O | 0.837  | -1.476 | -2.631 | H | -3.744 | 3.649  | 0.473  |
| C | 1.395  | -2.167 | -1.774 | C | -4.857 | 1.84   | 0.888  |
| C | 1.162  | -4.317 | -0.37  | H | -5.845 | 2.137  | 0.508  |
| C | 2.726  | -1.775 | -1.164 | C | -4.74  | 0.31   | 0.906  |
| H | 3.526  | -2.371 | -1.632 | C | -3.701 | -1.693 | -0.303 |
| C | 2.98   | -0.288 | -1.385 | C | -4.495 | -0.386 | -0.436 |
| H | 2.201  | 0.28   | -0.858 | H | -3.924 | -2.195 | 0.645  |
| H | 2.821  | -0.068 | -2.447 | C | -1.31  | -1.471 | 0.595  |
| H | 2.745  | -2.011 | -0.092 | H | 5.109  | -0.381 | -1.593 |
| H | 2.215  | -4.155 | -0.109 | H | 4.5    | 1.231  | -1.278 |
| H | 1.098  | -5.292 | -0.873 | C | 4.769  | 0.02   | 0.482  |
| C | 0.265  | -4.29  | 0.871  | H | 5.862  | 0.084  | 0.577  |
| C | 0.705  | -3.242 | 1.896  | H | 4.492  | -0.975 | 0.853  |
| C | -0.401 | -2.549 | 2.701  | C | 4.204  | 1.073  | 1.428  |
| H | 1.271  | -2.47  | 1.368  | H | 4.587  | 0.9    | 2.447  |
| H | 1.413  | -3.696 | 2.605  | H | 4.521  | 2.074  | 1.117  |
| H | 0.245  | -5.294 | 1.319  | H | -2.177 | 4.114  | -1.427 |
| H | -0.757 | -4.105 | 0.513  | H | -1.043 | 3.407  | -2.584 |
| N | 2.759  | 1.091  | 1.47   | H | -0.153 | 5.2    | -0.856 |
| N | -1.665 | 2.158  | -1.043 | H | -0.252 | 3.896  | 0.328  |
| N | -2.266 | -1.485 | -0.369 | H | 1.248  | 2.52   | -1.294 |
| O | 2.236  | -0.183 | 1.698  | H | 1.473  | 3.993  | -2.205 |
| O | 0.653  | 1.824  | 1.341  | H | -4.826 | 2.18   | 1.931  |
| O | -0.575 | 1.27   | -1.097 | H | -5.448 | -0.6   | -0.939 |
| O | -2.098 | 1.198  | 0.973  | H | -3.937 | 0.257  | -1.132 |
| O | -1.896 | -1.067 | -1.649 | H | -3.925 | 0.042  | 1.587  |
| O | -0.187 | -1     | 0.363  | H | -5.658 | -0.092 | 1.359  |
| C | 1.866  | 2.095  | 1.33   | H | -3.956 | -2.389 | -1.114 |
| C | 2.345  | 3.519  | 1.165  | C | -1.647 | -2.116 | 1.919  |
| H | 3.301  | 3.696  | 1.673  | H | 0.04   | -1.67  | 3.189  |
| H | 1.597  | 4.119  | 1.697  | H | -0.746 | -3.202 | 3.515  |
| C | 2.442  | 3.997  | -0.293 | H | -2.307 | -2.978 | 1.751  |
| H | 3.363  | 3.594  | -0.741 | H | -2.226 | -1.404 | 2.527  |
| H | 2.573  | 5.09   | -0.273 | C | 1.272  | 3.61   | -1.193 |
| C | -0.104 | 4.106  | -0.741 | C | 4.378  | 0.175  | -0.986 |
| C | -1.279 | 3.489  | -1.514 | H | -0.755 | -2.697 | -2.202 |
| C | -2.447 | 1.974  | 0.094  | H | 1.287  | -0.118 | 1.412  |
| C | -3.811 | 2.626  | 0.074  | H | -1.23  | -0.339 | -1.511 |
| H | -4.13  | 2.732  | -0.971 | H | -0.311 | 1.116  | -0.152 |

**Table S2-B: Zr-C5**

| Atom | Coordinates (Angstroms) |        |        |   |        |        |        |
|------|-------------------------|--------|--------|---|--------|--------|--------|
|      | X                       | Y      | Z      |   |        |        |        |
| ZR   | -0.231                  | 0.039  | -0.187 | C | -2.544 | 1.943  | 0.13   |
| N    | 1.626                   | -1.928 | -1.356 | C | -3.994 | 2.313  | 0.337  |
| O    | 0.288                   | -1.732 | -1.285 | H | -4.443 | 2.473  | -0.651 |
| O    | 1.745                   | 0.304  | -1.336 | H | -4.082 | 3.277  | 0.861  |
| C    | 2.351                   | -0.812 | -1.435 | C | -4.796 | 1.265  | 1.141  |
| C    | 2.013                   | -3.345 | -1.37  | H | -5.858 | 1.517  | 0.995  |
| C    | 3.824                   | -0.842 | -1.713 | C | -4.579 | -0.239 | 0.895  |
| H    | 3.933                   | -0.694 | -2.798 | C | -3.962 | -2.09  | -0.772 |
| C    | 4.607                   | 0.249  | -0.971 | C | -4.726 | -0.775 | -0.53  |
| H    | 3.934                   | 1.101  | -0.803 | H | -4.313 | -2.897 | -0.115 |
| H    | 5.409                   | 0.616  | -1.625 | C | -1.862 | -2.344 | 0.558  |
| H    | 4.244                   | -1.837 | -1.508 | H | 5.93   | -1.045 | 0.108  |
| H    | 2.979                   | -3.439 | -0.855 | H | 5.874  | 0.592  | 0.73   |
| H    | 2.155                   | -3.673 | -2.411 | C | 4.291  | -0.68  | 1.436  |
| C    | 0.943                   | -4.204 | -0.692 | H | 4.885  | -1.175 | 2.215  |
| C    | 0.761                   | -3.884 | 0.792  | H | 3.585  | -1.44  | 1.068  |
| C    | -0.55                   | -4.318 | 1.467  | C | 3.476  | 0.414  | 2.12   |
| H    | 0.887                   | -2.807 | 0.945  | H | 3.211  | 0.089  | 3.137  |
| H    | 1.578                   | -4.359 | 1.358  | H | 4.05   | 1.346  | 2.205  |
| H    | 1.235                   | -5.256 | -0.834 | H | -2.544 | 4.373  | -0.882 |
| H    | 0.004                   | -4.061 | -1.239 | H | -1.441 | 4.01   | -2.223 |
| N    | 2.228                   | 0.717  | 1.441  | H | -0.532 | 5.465  | -0.266 |
| N    | -1.888                  | 2.412  | -0.978 | H | -0.578 | 4.005  | 0.723  |
| N    | -2.537                  | -1.884 | -0.511 | H | 0.922  | 2.963  | -1.209 |
| O    | 1.422                   | -0.371 | 1.265  | H | 1.175  | 4.619  | -1.7   |
| O    | 0.426                   | 1.88   | 0.896  | H | -4.599 | 1.431  | 2.209  |
| O    | -0.834                  | 1.642  | -1.409 | H | -5.782 | -0.95  | -0.784 |
| O    | -2.031                  | 1.052  | 0.839  | H | -4.342 | -0.049 | -1.256 |
| O    | -2.09                   | -0.724 | -1.047 | H | -3.581 | -0.491 | 1.265  |
| O    | -1.003                  | -1.592 | 1.112  | H | -5.286 | -0.769 | 1.552  |
| C    | 1.636                   | 1.901  | 1.259  | H | -4.092 | -2.409 | -1.815 |
| C    | 2.244                   | 3.261  | 1.406  | C | -1.906 | -3.802 | 0.929  |
| H    | 3.287                   | 3.233  | 1.744  | H | -0.471 | -4.011 | 2.517  |
| H    | 1.671                   | 3.747  | 2.21   | H | -0.619 | -5.417 | 1.48   |
| C    | 2.153                   | 4.13   | 0.121  | H | -2.226 | -4.377 | 0.049  |
| H    | 3.046                   | 3.917  | -0.484 | H | -2.664 | -3.991 | 1.705  |
| H    | 2.261                   | 5.177  | 0.443  | C | 0.952  | 3.985  | -0.827 |
| C    | -0.442                  | 4.367  | -0.304 | C | 5.24   | -0.218 | 0.335  |
| C    | -1.621                  | 3.844  | -1.152 |   |        |        |        |

**Table S3-A: L5**

| Atom | Coordinates (Angstroms) |        |        | Atom | X      | Y      | Z      |
|------|-------------------------|--------|--------|------|--------|--------|--------|
|      | X                       | Y      | Z      |      |        |        |        |
| C    | -1.112                  | 1.521  | -2.031 | H    | 0.404  | -4.05  | 0.426  |
| O    | -1.487                  | 0.366  | -2.292 | C    | 2.335  | -3.126 | 0.223  |
| O    | 1.119                   | 0.85   | -2.341 | H    | 2.721  | -3.83  | 0.979  |
| N    | 0.198                   | 1.83   | -1.962 | C    | 4.438  | -1.039 | 0.793  |
| C    | 0.849                   | 3.101  | -1.746 | C    | 4.68   | -2.157 | -0.217 |
| C    | -2.094                  | 2.653  | -1.792 | H    | 5.378  | -0.492 | 0.975  |
| H    | -2.008                  | 3.365  | -2.627 | C    | 2.42   | 0.426  | 1.176  |
| C    | -3.531                  | 2.163  | -1.67  | H    | -4.774 | 0.887  | -0.451 |
| H    | -3.768                  | 1.538  | -2.539 | H    | -3.056 | 0.55   | -0.359 |
| H    | -4.202                  | 3.035  | -1.711 | C    | -3.686 | 2.209  | 0.88   |
| H    | -1.801                  | 3.21   | -0.893 | H    | -4.664 | 2.629  | 1.155  |
| H    | 1.681                   | 2.913  | -1.054 | H    | -3.028 | 3.07   | 0.713  |
| H    | 0.14                    | 3.749  | -1.218 | C    | -3.148 | 1.447  | 2.088  |
| C    | 1.337                   | 3.756  | -3.032 | H    | -2.988 | 2.139  | 2.929  |
| C    | 1.387                   | 0.778  | 3.474  | H    | -3.856 | 0.682  | 2.42   |
| C    | 1.718                   | 2.254  | 3.643  | H    | -1.146 | -5.077 | -0.959 |
| H    | 0.481                   | 3.928  | -3.702 | H    | -2.491 | -4.418 | -1.889 |
| H    | 2.001                   | 3.056  | -3.554 | H    | -3.038 | -4.507 | 0.547  |
| N    | -1.898                  | 0.774  | 1.794  | H    | -1.601 | -3.554 | 0.917  |
| N    | -0.881                  | -3.171 | -1.735 | H    | -2.551 | -1.637 | -0.429 |
| N    | 3.398                   | -0.106 | 0.409  | H    | -4.018 | -2.558 | -0.681 |
| O    | -1.018                  | 1.657  | 1.163  | H    | 2.038  | -2.219 | 0.763  |
| O    | -0.537                  | -0.962 | 1.306  | H    | 5.303  | -2.904 | 0.3    |
| O    | -1.574                  | -2.354 | -2.628 | H    | 5.288  | -1.771 | -1.044 |
| O    | 0.816                   | -1.686 | -1.667 | C    | 3.423  | -2.798 | -0.794 |
| O    | 3.535                   | 0.364  | -0.896 | H    | 3.003  | -2.122 | -1.543 |
| O    | 1.606                   | 1.218  | 0.675  | H    | 3.711  | -3.716 | -1.329 |
| C    | -1.611                  | -0.554 | 1.769  | H    | 4.123  | -1.465 | 1.75   |
| C    | -2.645                  | -1.493 | 2.358  | C    | 2.378  | -0.008 | 2.63   |
| H    | -3.107                  | -1.073 | 3.26   | H    | 1.81   | 2.718  | 2.652  |
| H    | -2.086                  | -2.379 | 2.681  | H    | 2.702  | 2.358  | 4.129  |
| C    | -3.732                  | -1.891 | 1.352  | C    | 0.658  | 2.981  | 4.451  |
| H    | -4.379                  | -1.023 | 1.152  | H    | -0.318 | 2.913  | 3.952  |
| H    | -4.377                  | -2.649 | 1.822  | H    | 0.894  | 4.044  | 4.577  |
| C    | -2.392                  | -3.699 | 0.166  | H    | 0.384  | 0.678  | 3.043  |
| C    | -1.741                  | -4.172 | -1.129 | H    | 1.335  | 0.302  | 4.465  |
| C    | 0.329                   | -2.76  | -1.292 | H    | 3.385  | 0.083  | 3.065  |
| C    | 1.072                   | -3.723 | -0.382 | H    | 2.125  | -1.078 | 2.666  |
| H    | 1.311                   | -4.629 | -0.962 | C    | -3.188 | -2.409 | 0.026  |
|      |                         |        |        | C    | -3.787 | 1.369  | -0.393 |
|      |                         |        |        | C    | 2.059  | 5.062  | -2.75  |
|      |                         |        |        | H    | 2.416  | 5.532  | -3.673 |
|      |                         |        |        | H    | 2.93   | 4.901  | -2.103 |

|   |        |        |        |
|---|--------|--------|--------|
| H | 1.405  | 5.784  | -2.244 |
| H | 0.547  | 2.545  | 5.454  |
| H | -0.153 | 1.174  | 1.051  |
| H | 2.609  | 0.556  | -1.196 |
| H | -1.29  | -1.425 | -2.44  |
| H | 0.673  | -0.019 | -2.163 |

|   |        |        |        |
|---|--------|--------|--------|
| H | -1.388 | -3.332 | 2.833  |
| C | -2.929 | -3.49  | 1.306  |
| H | -3.934 | -3.061 | 1.187  |
| H | -3.085 | -4.519 | 1.667  |
| C | -0.944 | -4.295 | -0.13  |
| C | -0.065 | -4.01  | -1.356 |
| C | 1.737  | -2.543 | -0.509 |
| C | 2.961  | -3.393 | -0.715 |
| H | 2.782  | -4.173 | -1.467 |
| H | 3.268  | -3.886 | 0.217  |
| C | 4.063  | -2.415 | -1.181 |
| H | 4.982  | -2.976 | -1.402 |
| C | 4.257  | 0.727  | -1.312 |
| C | 4.253  | -0.187 | -2.535 |
| H | 4.584  | 1.731  | -1.628 |
| C | 2.83   | 0.99   | 0.696  |
| H | -5.358 | -0.923 | 0.963  |
| H | -3.679 | -0.969 | 0.446  |
| C | -4.16  | 0.764  | 1.592  |
| H | -5.047 | 1.198  | 2.075  |
| H | -3.623 | 1.596  | 1.119  |
| C | -3.231 | 0.213  | 2.669  |
| H | -3.001 | 0.982  | 3.418  |
| H | -3.681 | -0.644 | 3.184  |
| H | 0.7    | -4.791 | -1.459 |
| H | -0.655 | -3.99  | -2.282 |
| H | -1.167 | -5.373 | -0.117 |
| H | -0.338 | -4.091 | 0.765  |
| H | -2.08  | -2.476 | -0.406 |
| H | -2.963 | -3.937 | -0.789 |
| H | 4.288  | -1.762 | -0.328 |
| H | 5.306  | -0.265 | -2.846 |
| H | 3.73   | 0.325  | -3.352 |
| C | 3.622  | -1.57  | -2.383 |
| H | 2.54   | -1.405 | -2.343 |
| H | 3.801  | -2.131 | -3.312 |
| H | 4.988  | 0.369  | -0.578 |
| C | 4.023  | 1.172  | 1.594  |
| H | 2.309  | 3.26   | 2.183  |
| H | 3.964  | 3.824  | 2.398  |
| C | 2.8    | 3.781  | 4.214  |
| H | 1.984  | 3.206  | 4.67   |

**Table S3-B: Zr-L5**

| Atom | Coordinates (Angstroms) |        |        |
|------|-------------------------|--------|--------|
|      | X                       | Y      | Z      |
| ZR   | 0.11                    | 0.052  | -0.127 |
| C    | -2.572                  | 1.155  | -1.138 |
| O    | -2.056                  | 0.01   | -0.97  |
| O    | -0.442                  | 1.966  | -0.944 |
| N    | -1.768                  | 2.216  | -1.086 |
| C    | -2.058                  | 3.601  | -1.404 |
| C    | -4.051                  | 1.333  | -1.37  |
| H    | -4.235                  | 1.447  | -2.449 |
| C    | -4.915                  | 0.192  | -0.829 |
| H    | -4.862                  | -0.663 | -1.516 |
| H    | -5.959                  | 0.538  | -0.854 |
| H    | -4.374                  | 2.279  | -0.918 |
| H    | -1.562                  | 4.208  | -0.635 |
| H    | -3.138                  | 3.767  | -1.311 |
| C    | -1.564                  | 3.989  | -2.79  |
| C    | 3.649                   | 1.765  | 2.945  |
| C    | 3.174                   | 3.209  | 2.858  |
| H    | -2.087                  | 3.379  | -3.542 |
| H    | -0.502                  | 3.723  | -2.858 |
| N    | -1.97                   | -0.223 | 2.095  |
| N    | 0.636                   | -2.734 | -1.266 |
| N    | 2.977                   | 0.835  | -0.615 |
| O    | -1.237                  | 0.768  | 1.522  |
| O    | -0.442                  | -1.614 | 1.283  |
| O    | -0.185                  | -1.649 | -1.401 |
| O    | 1.863                   | -1.475 | 0.134  |
| O    | 1.848                   | 0.729  | -1.357 |
| O    | 1.653                   | 0.958  | 1.188  |
| C    | -1.522                  | -1.466 | 1.935  |
| C    | -2.198                  | -2.712 | 2.425  |
| H    | -2.894                  | -2.526 | 3.252  |

|    |        |        |        |   |        |        |        |
|----|--------|--------|--------|---|--------|--------|--------|
| H  | 2.467  | 4.823  | 4.14   | C | -2.94  | 1.713  | 2.263  |
| H  | 2.862  | 1.149  | 3.4    | C | -4.375 | 1.43   | 1.814  |
| H  | 4.524  | 1.704  | 3.609  | H | -3.725 | -0.149 | 0.508  |
| H  | 4.779  | 1.804  | 1.105  | H | -5.476 | -0.003 | 0.637  |
| H  | 4.495  | 0.185  | 1.732  | H | -5.502 | 1.977  | -0.789 |
| C  | -2.254 | -3.504 | -0.067 | H | -3.747 | 2.042  | -0.858 |
| C  | -4.539 | -0.302 | 0.568  | N | 0.352  | -1.783 | 1.312  |
| C  | -1.772 | 5.466  | -3.068 | N | 4.055  | 0.352  | -0.911 |
| H  | -1.413 | 5.741  | -4.066 | N | -0.771 | 2.842  | -0.626 |
| H  | -1.233 | 6.088  | -2.342 | O | 0.041  | -0.513 | 1.806  |
| H  | -2.833 | 5.745  | -3.013 | O | 1.133  | -0.795 | -0.562 |
| H  | 3.649  | 3.753  | 4.91   | O | 3.493  | -0.375 | -1.964 |
| ZR | 0.11   | 0.052  | -0.127 | O | 2.426  | 1.884  | -1.246 |
| C  | -2.572 | 1.155  | -1.138 | O | -0.222 | 2.264  | -1.762 |
| O  | -2.056 | 0.01   | -0.97  | O | -1.534 | 0.807  | -0.005 |
| O  | -0.442 | 1.966  | -0.944 | C | 0.925  | -1.836 | 0.078  |
| N  | -1.768 | 2.216  | -1.086 | C | 1.242  | -3.198 | -0.493 |
| C  | -2.058 | 3.601  | -1.404 | H | 0.562  | -3.334 | -1.345 |
| C  | -4.051 | 1.333  | -1.37  | H | 1.017  | -4.005 | 0.212  |

**Table S4-A: C6**

| Atom | Coordinates (Angstroms) |        |        | Atom | X      | Y      | Z      |
|------|-------------------------|--------|--------|------|--------|--------|--------|
|      | X                       | Y      | Z      |      |        |        |        |
| N    | -3.335                  | -0.237 | -2.194 | C    | 3.668  | -2.68  | 0.073  |
| O    | -2.389                  | 0.63   | -2.736 | C    | 5.762  | -1.235 | 0.081  |
| O    | -1.737                  | -1.823 | -1.964 | C    | 5.461  | 0.009  | -0.748 |
| C    | -2.91                   | -1.476 | -1.822 | C    | 3.432  | 1.531  | -0.622 |
| C    | -4.601                  | 0.434  | -1.979 | C    | 3.887  | 2.289  | 0.599  |
| C    | -3.955                  | -2.423 | -1.245 | H    | 3.862  | 3.359  | 0.35   |
| H    | -4.448                  | -2.934 | -2.086 | H    | 4.916  | 2.048  | 0.89   |
| C    | -3.304                  | -3.438 | -0.317 | C    | 2.961  | 2.005  | 1.793  |
| C    | -2.699                  | -2.793 | 0.921  | H    | 3.397  | 2.498  | 2.675  |
| H    | -3.49                   | -2.319 | 1.526  | C    | 1.512  | 2.457  | 1.631  |
| H    | -2.032                  | -1.979 | 0.604  | C    | -0.415 | 4.241  | -0.439 |
| H    | -2.511                  | -3.96  | -0.871 | C    | 1.022  | 4.466  | 0.025  |
| H    | -4.045                  | -4.198 | -0.027 | H    | -1.124 | 4.671  | 0.278  |
| H    | -4.746                  | -1.883 | -0.709 | C    | -1.461 | 2.028  | 0.205  |
| H    | -5.384                  | -0.328 | -1.895 | H    | -2.636 | -4.485 | 2.25   |
| H    | -4.809                  | 1.006  | -2.892 | H    | -1.28  | -4.396 | 1.144  |
| C    | -4.597                  | 1.351  | -0.759 | C    | -1.076 | -3.114 | 2.869  |
| C    | -4.545                  | 0.581  | 0.553  | H    | -0.952 | -3.783 | 3.733  |
|      |                         |        |        | H    | -1.578 | -2.212 | 3.248  |
|      |                         |        |        | C    | 0.324  | -2.744 | 2.399  |
|      |                         |        |        | H    | 0.9    | -2.301 | 3.225  |



|   |        |        |        |   |        |        |        |
|---|--------|--------|--------|---|--------|--------|--------|
| H | 0.866  | -3.637 | 2.074  | C | -4.126 | -0.6   | -2.096 |
| H | 5.97   | 0.879  | -0.321 | H | -4.115 | -1.133 | -3.056 |
| H | 5.856  | -0.12  | -1.767 | C | -4.452 | -1.574 | -0.955 |
| H | 6.857  | -1.341 | 0.081  | C | -4.393 | -0.889 | 0.403  |
| H | 5.473  | -1.058 | 1.129  | H | -5.198 | -0.14  | 0.482  |
| H | 5.115  | -2.513 | -1.526 | H | -3.453 | -0.323 | 0.463  |
| H | 5.711  | -3.386 | -0.125 | H | -3.71  | -2.386 | -0.979 |
| H | 3.296  | -1.687 | 0.362  | H | -5.435 | -2.034 | -1.134 |
| H | 3.653  | -3.278 | 0.999  | H | -4.891 | 0.183  | -2.168 |
| H | 2.974  | 0.924  | 2.001  | H | -4.365 | 1.996  | -0.766 |
| H | 1.194  | 5.551  | -0.025 | H | -4.146 | 2.408  | -2.478 |
| H | 1.706  | 4.006  | -0.7   | C | -3.031 | 3.664  | -1.117 |
| C | 1.337  | 3.976  | 1.441  | C | -2.453 | 3.717  | 0.303  |
| H | 2.254  | 4.481  | 1.783  | C | -0.405 | 4.445  | 1.687  |
| H | 0.55   | 4.348  | 2.117  | C | -1.209 | 4.598  | 0.383  |
| H | 1.069  | 1.894  | 0.802  | H | -2.17  | 2.707  | 0.628  |
| H | 0.969  | 2.126  | 2.527  | H | -3.217 | 4.073  | 1.012  |
| H | -0.583 | 4.736  | -1.404 | H | -3.82  | 4.417  | -1.247 |
| C | -2.128 | 2.678  | 1.404  | H | -2.246 | 3.912  | -1.842 |
| H | -4.916 | 2.384  | 1.698  | N | -1.52  | -1.527 | 1.696  |
| H | -4.871 | 0.915  | 2.649  | N | 2.483  | -1.315 | -1.216 |
| H | -2.393 | 0.763  | 2.354  | N | 1.769  | 2.536  | -0.452 |
| H | -2.986 | 2.138  | 3.275  | O | -1.346 | -0.251 | 1.241  |
| H | -2.763 | 3.51   | 1.063  | O | -0.286 | -2.162 | -0.033 |
| H | -1.342 | 3.143  | 2.016  | O | 1.261  | -1.08  | -1.771 |
| C | 5.106  | -2.52  | -0.426 | O | 1.757  | -0.479 | 0.75   |
| C | -1.929 | -3.779 | 1.79   | O | 1.511  | 1.436  | -1.2   |
| H | 0.676  | 1.934  | -1.509 | O | 0.151  | 1.831  | 0.912  |
| H | 2.552  | -0.507 | -1.671 | C | -0.901 | -2.49  | 1.011  |
| H | -1.631 | 0.614  | -2.106 | C | -0.847 | -3.929 | 1.463  |
| H | -0.456 | -0.08  | 1.067  | H | -1.862 | -4.331 | 1.598  |

**Table S4-B: Zr-C6**

| Atom | Coordinates (Angstroms) |        |        |
|------|-------------------------|--------|--------|
|      | X                       | Y      | Z      |
| ZR   | -0.062                  | 0.073  | -0.508 |
| N    | -2.59                   | 1.282  | -1.626 |
| O    | -1.316                  | 1.652  | -1.34  |
| O    | -1.756                  | -0.781 | -1.766 |
| C    | -2.767                  | -0.013 | -1.862 |
| C    | -3.626                  | 2.324  | -1.513 |

|   |        |        |        |
|---|--------|--------|--------|
| H | -4.126 | -0.6   | -2.096 |
| H | -4.115 | -1.133 | -3.056 |
| C | -4.452 | -1.574 | -0.955 |
| C | -4.393 | -0.889 | 0.403  |
| H | -5.198 | -0.14  | 0.482  |
| H | -3.453 | -0.323 | 0.463  |
| H | -3.71  | -2.386 | -0.979 |
| H | -5.435 | -2.034 | -1.134 |
| H | -4.891 | 0.183  | -2.168 |
| H | -4.365 | 1.996  | -0.766 |
| H | -4.146 | 2.408  | -2.478 |
| C | -3.031 | 3.664  | -1.117 |
| C | -2.453 | 3.717  | 0.303  |
| C | -0.405 | 4.445  | 1.687  |
| C | -1.209 | 4.598  | 0.383  |
| H | -2.17  | 2.707  | 0.628  |
| H | -3.217 | 4.073  | 1.012  |
| H | -3.82  | 4.417  | -1.247 |
| H | -2.246 | 3.912  | -1.842 |
| N | -1.52  | -1.527 | 1.696  |
| N | 2.483  | -1.315 | -1.216 |
| N | 1.769  | 2.536  | -0.452 |
| O | -1.346 | -0.251 | 1.241  |
| O | -0.286 | -2.162 | -0.033 |
| O | 1.261  | -1.08  | -1.771 |
| O | 1.757  | -0.479 | 0.75   |
| O | 1.511  | 1.436  | -1.2   |
| O | 0.151  | 1.831  | 0.912  |
| C | -0.901 | -2.49  | 1.011  |
| C | -0.847 | -3.929 | 1.463  |
| H | -1.862 | -4.331 | 1.598  |
| H | -0.371 | -3.978 | 2.456  |
| C | -0.072 | -4.777 | 0.453  |
| H | -0.588 | -4.698 | -0.514 |
| H | -0.154 | -5.829 | 0.757  |
| C | 1.406  | -4.384 | 0.262  |
| C | 3.218  | -3.693 | -1.431 |
| C | 3.308  | -2.26  | -1.962 |
| C | 2.699  | -0.959 | 0.052  |
| C | 4.095  | -1.046 | 0.616  |
| H | 4.818  | -0.737 | -0.153 |
| H | 4.343  | -2.095 | 0.843  |
| C | 4.273  | -0.215 | 1.885  |

|   |        |        |        |
|---|--------|--------|--------|
| H | 5.313  | -0.351 | 2.221  |
| C | 3.968  | 1.281  | 1.795  |
| C | 3.033  | 3.165  | -0.802 |
| C | 4.226  | 2.219  | -0.641 |
| H | 3.157  | 4.066  | -0.189 |
| C | 1.011  | 2.717  | 0.628  |
| H | -5.49  | -2.06  | 1.868  |
| H | -3.98  | -2.785 | 1.35   |
| C | -3.724 | -1.223 | 2.823  |
| H | -4.211 | -1.508 | 3.765  |
| H | -3.767 | -0.126 | 2.773  |
| C | -2.263 | -1.659 | 2.932  |
| H | -1.744 | -1.079 | 3.708  |
| H | -2.212 | -2.718 | 3.214  |
| H | 4.35   | -1.909 | -1.954 |
| H | 2.944  | -2.194 | -2.992 |
| H | 3.764  | -4.333 | -2.139 |
| H | 3.782  | -3.762 | -0.487 |
| H | 1.068  | -3.498 | -1.652 |
| H | 1.643  | -5.162 | -1.731 |
| H | 1.615  | -3.444 | 0.793  |
| H | 2.062  | -5.142 | 0.72   |
| H | 3.636  | -0.643 | 2.67   |
| H | 5.025  | 2.605  | -1.291 |
| H | 3.931  | 1.249  | -1.064 |
| C | 4.788  | 2.082  | 0.776  |
| H | 5.798  | 1.645  | 0.71   |
| H | 4.946  | 3.1    | 1.169  |
| H | 2.895  | 1.408  | 1.618  |
| H | 4.157  | 1.697  | 2.796  |
| H | 2.948  | 3.476  | -1.852 |
| C | 1.038  | 3.984  | 1.437  |
| H | -0.568 | 4.326  | -0.471 |
| H | -1.484 | 5.651  | 0.217  |
| H | -0.891 | 3.702  | 2.331  |
| H | -0.377 | 5.383  | 2.255  |
| H | 1.6    | 4.769  | 0.915  |
| H | 1.55   | 3.802  | 2.394  |
| C | 1.783  | -4.204 | -1.209 |
| C | -4.448 | -1.822 | 1.613  |

**Table S5-A: L6**

| Atom | Coordinates (Angstroms) |        |        |
|------|-------------------------|--------|--------|
|      | X                       | Y      | Z      |
| C    | 2.624                   | -2.369 | 0.522  |
| O    | 1.553                   | -2.791 | 0.056  |
| O    | 1.451                   | -1.107 | 2.1    |
| N    | 2.67                    | -1.488 | 1.547  |
| C    | 3.844                   | -0.923 | 2.208  |
| C    | 3.936                   | -2.791 | -0.109 |
| H    | 4.154                   | -3.824 | 0.195  |
| C    | 3.823                   | -2.695 | -1.635 |
| C    | 3.28                    | -1.33  | -2.099 |
| H    | 3.998                   | -0.825 | -2.764 |
| H    | 3.184                   | -0.667 | -1.222 |
| H    | 3.152                   | -3.49  | -1.985 |
| H    | 4.809                   | -2.906 | -2.069 |
| H    | 4.774                   | -2.178 | 0.244  |
| H    | 3.474                   | -0.04  | 2.738  |
| H    | 4.542                   | -0.554 | 1.445  |
| C    | 4.518                   | -1.891 | 3.169  |
| C    | 6.579                   | 2.186  | -1.737 |
| C    | 3.572                   | 2.483  | -1.199 |
| C    | 4.645                   | 2.619  | -0.124 |
| H    | 6.829                   | 3.256  | -1.755 |
| H    | 7.51                    | 1.627  | -1.886 |
| H    | 5.388                   | -1.381 | 3.609  |
| H    | 4.921                   | -2.744 | 2.601  |
| N    | -0.741                  | -1.105 | -1.523 |
| N    | -3.491                  | -0.234 | 1.352  |
| N    | 0.232                   | 2.408  | 0.55   |
| O    | -0.107                  | -0.713 | -0.349 |
| O    | -2.028                  | -2.481 | -0.285 |
| O    | -2.215                  | -0.681 | 1.679  |
| O    | -2.65                   | 0.997  | -0.367 |
| O    | -0.409                  | 1.594  | 1.474  |
| O    | 2.093                   | 1.106  | 0.696  |
| C    | -1.801                  | -1.93  | -1.373 |
| C    | -2.705                  | -2.18  | -2.563 |
| H    | -2.177                  | -2.789 | -3.312 |
| H    | -2.933                  | -1.221 | -3.053 |
| C    | -3.998                  | -2.858 | -2.115 |
| H    | -3.747                  | -3.813 | -1.637 |

|   |        |        |        |   |        |        |        |
|---|--------|--------|--------|---|--------|--------|--------|
| H | -4.585 | -3.102 | -3.01  | C | 5.896  | 1.802  | -0.433 |
| C | -4.82  | -1.991 | -1.142 | H | 5.618  | 0.736  | -0.47  |
| C | -5.614 | -1.635 | 1.274  | H | 6.608  | 1.901  | 0.399  |
| C | -4.582 | -0.855 | 2.099  | H | 3.486  | 1.425  | -1.486 |
| C | -3.585 | 0.734  | 0.399  | H | 3.883  | 3.021  | -2.106 |
| C | -4.896 | 1.498  | 0.418  | H | 2.266  | 4.011  | -0.392 |
| H | -5.167 | 1.663  | 1.471  | H | 1.557  | 3.069  | -1.689 |
| H | -5.697 | 0.862  | 0.014  | C | -5.038 | -2.608 | 0.241  |
| C | -4.907 | 2.831  | -0.331 | C | 1.905  | -1.418 | -2.764 |
| H | -5.791 | 3.378  | 0.027  | C | 3.586  | -2.388 | 4.26   |
| C | -3.657 | 3.712  | -0.218 | H | 5.937  | 1.986  | -2.605 |
| C | -0.577 | 3.468  | -0.04  | H | 4.097  | -3.083 | 4.936  |
| C | -1.466 | 4.226  | 0.95   | H | 2.719  | -2.907 | 3.835  |
| H | 0.124  | 4.169  | -0.499 | H | 3.198  | -1.557 | 4.861  |
| C | 1.507  | 2.085  | 0.218  | H | -0.877 | 0.893  | 0.953  |
| H | 2.002  | -1.801 | -3.792 | H | -1.975 | -1.366 | 0.995  |
| H | 1.327  | -2.172 | -2.215 | H | 1.322  | -0.193 | 1.728  |
| C | 1.13   | -0.101 | -2.747 | H | 0.409  | -1.517 | -0.046 |
| H | 1.358  | 0.524  | -3.623 |   |        |        |        |
| H | 1.439  | 0.474  | -1.865 |   |        |        |        |
| C | -0.382 | -0.28  | -2.665 |   |        |        |        |
| H | -0.883 | 0.7    | -2.578 |   |        |        |        |
| H | -0.772 | -0.782 | -3.559 |   |        |        |        |
| H | -5.093 | -0.097 | 2.715  |   |        |        |        |
| H | -4.073 | -1.532 | 2.79   |   |        |        |        |
| H | -6.224 | -2.179 | 2.009  |   |        |        |        |
| H | -6.314 | -0.945 | 0.781  |   |        |        |        |
| H | -4.086 | -3.016 | 0.602  |   |        |        |        |
| H | -5.718 | -3.467 | 0.137  |   |        |        |        |
| H | -4.315 | -1.023 | -1.032 |   |        |        |        |
| H | -5.803 | -1.754 | -1.58  |   |        |        |        |
| H | -5.091 | 2.645  | -1.398 |   |        |        |        |
| H | -1.524 | 5.268  | 0.6    |   |        |        |        |
| H | -0.965 | 4.256  | 1.926  |   |        |        |        |
| C | -2.89  | 3.689  | 1.103  |   |        |        |        |
| H | -2.831 | 2.676  | 1.518  |   |        |        |        |
| H | -3.414 | 4.293  | 1.859  |   |        |        |        |
| H | -2.98  | 3.406  | -1.021 |   |        |        |        |
| H | -3.941 | 4.75   | -0.449 |   |        |        |        |
| H | -1.176 | 3.031  | -0.852 |   |        |        |        |
| C | 2.196  | 2.989  | -0.797 |   |        |        |        |
| H | 4.233  | 2.293  | 0.839  |   |        |        |        |
| H | 4.917  | 3.681  | -0.007 |   |        |        |        |

**Table S5-B: Zr-L6**

| Atom | Coordinates (Angstroms) |        |        |
|------|-------------------------|--------|--------|
|      | X                       | Y      | Z      |
| ZR   | -0.35                   | -0.04  | 0.34   |
| C    | 2.15                    | -1.381 | 1.322  |
| O    | 1.118                   | -1.723 | 0.671  |
| O    | 0.836                   | 0.298  | 2.151  |
| N    | 2.044                   | -0.327 | 2.127  |
| C    | 3.064                   | 0.227  | 2.998  |
| C    | 3.448                   | -2.117 | 1.116  |
| H    | 3.79                    | -2.57  | 2.059  |
| C    | 3.31                    | -3.181 | 0.028  |
| C    | 2.905                   | -2.633 | -1.354 |
| H    | 3.761                   | -2.674 | -2.047 |
| H    | 2.624                   | -1.574 | -1.271 |
| H    | 2.556                   | -3.908 | 0.36   |
| H    | 4.258                   | -3.733 | -0.031 |
| H    | 4.225                   | -1.388 | 0.837  |
| H    | 2.968                   | 1.319  | 2.92   |
| H    | 4.042                   | -0.052 | 2.585  |
| C    | 2.947                   | -0.231 | 4.447  |
| C    | 6.993                   | 0.988  | -1.313 |

|   |        |        |        |   |        |        |        |
|---|--------|--------|--------|---|--------|--------|--------|
| C | 3.98   | 1.74   | -1.679 | H | -0.881 | -3.548 | -3.257 |
| C | 4.658  | 1.4    | -0.357 | H | -4.869 | 1.553  | 2.115  |
| H | 7.351  | 1.939  | -0.898 | H | -3.858 | 0.485  | 3.096  |
| H | 7.841  | 0.293  | -1.326 | H | -5.943 | -0.666 | 2.534  |
| H | 3.802  | 0.194  | 4.994  | H | -5.778 | -0.301 | 0.832  |
| H | 3.074  | -1.323 | 4.484  | H | -3.421 | -1.805 | 1.861  |
| N | -0.829 | -1.906 | -1.997 | H | -4.926 | -2.691 | 2.083  |
| N | -3.148 | 0.762  | 1.213  | H | -3.946 | -1.516 | -0.561 |
| N | 0.563  | 2.774  | -0.485 | H | -5.42  | -2.448 | -0.357 |
| O | -0.065 | -0.829 | -1.667 | H | -3.954 | 1.941  | -2.786 |
| O | -1.535 | -1.941 | 0.128  | H | -1.051 | 5.728  | -0.927 |
| O | -1.976 | 0.26   | 1.706  | H | -0.751 | 4.948  | 0.617  |
| O | -2.293 | 0.537  | -0.85  | C | -2.375 | 4.068  | -0.514 |
| O | -0.462 | 2.096  | 0.077  | H | -2.468 | 3.372  | 0.327  |
| O | 1.626  | 0.81   | -0.521 | H | -3.144 | 4.844  | -0.365 |
| C | -1.576 | -2.445 | -1.03  | H | -1.843 | 2.571  | -1.943 |
| C | -2.556 | -3.56  | -1.3   | H | -2.574 | 4.005  | -2.668 |
| H | -2.025 | -4.521 | -1.377 | H | -0.026 | 3.88   | -2.164 |
| H | -3.041 | -3.4   | -2.274 | C | 2.788  | 2.677  | -1.533 |
| C | -3.592 | -3.625 | -0.176 | H | 3.905  | 0.962  | 0.314  |
| H | -3.061 | -3.864 | 0.754  | H | 5.005  | 2.329  | 0.127  |
| H | -4.264 | -4.471 | -0.372 | C | 5.832  | 0.437  | -0.5   |
| C | -4.396 | -2.327 | 0.03   | H | 5.475  | -0.5   | -0.958 |
| C | -5.198 | -0.564 | 1.732  | H | 6.192  | 0.162  | 0.503  |
| C | -4.296 | 0.615  | 2.103  | H | 3.646  | 0.811  | -2.164 |
| C | -3.233 | 0.933  | -0.115 | H | 4.702  | 2.21   | -2.362 |
| C | -4.382 | 1.723  | -0.683 | H | 3.087  | 3.601  | -1.013 |
| H | -4.808 | 2.355  | 0.109  | H | 2.441  | 3.001  | -2.527 |
| H | -5.19  | 1.041  | -0.99  | C | -4.453 | -1.89  | 1.495  |
| C | -3.98  | 2.581  | -1.895 | C | 1.71   | -3.373 | -1.955 |
| H | -4.797 | 3.3    | -2.061 | C | 1.644  | 0.166  | 5.119  |
| C | -2.638 | 3.315  | -1.811 | H | 6.71   | 1.172  | -2.357 |
| C | 0.19   | 4.051  | -1.097 | H | 1.634  | -0.151 | 6.168  |
| C | -0.996 | 4.746  | -0.434 | H | 0.782  | -0.278 | 4.612  |
| H | 1.068  | 4.709  | -1.05  | H | 1.501  | 1.253  | 5.092  |
| C | 1.63   | 2.041  | -0.812 |   |        |        |        |
| H | 1.978  | -4.422 | -2.155 |   |        |        |        |
| H | 0.937  | -3.4   | -1.174 |   |        |        |        |
| C | 1.141  | -2.711 | -3.216 |   |        |        |        |
| H | 1.423  | -3.258 | -4.126 |   |        |        |        |
| H | 1.558  | -1.701 | -3.314 |   |        |        |        |
| C | -0.384 | -2.571 | -3.213 |   |        |        |        |
| H | -0.71  | -1.984 | -4.084 |   |        |        |        |

  

| Table S6-A: C7 |                         |        |        |
|----------------|-------------------------|--------|--------|
| Atom           | Coordinates (Angstroms) |        |        |
|                | X                       | Y      | Z      |
| N              | -3.374                  | -1.178 | -2.193 |
| O              | -2.245                  | -0.536 | -2.687 |

|   |        |        |        |   |        |        |        |
|---|--------|--------|--------|---|--------|--------|--------|
| O | -2.08  | -2.324 | -0.717 | C | 5.607  | -0.975 | -1.94  |
| C | -3.196 | -2.076 | -1.198 | C | 4.608  | 0.095  | -2.374 |
| C | -4.609 | -0.7   | -2.799 | C | 3.477  | 0.771  | -0.213 |
| C | -4.413 | -2.821 | -0.672 | C | 4.765  | 1.444  | 0.225  |
| H | -4.553 | -3.721 | -1.289 | H | 5.113  | 2.105  | -0.583 |
| C | -4.195 | -3.196 | 0.788  | H | 5.554  | 0.688  | 0.335  |
| C | -4.115 | -1.968 | 1.694  | C | 4.664  | 2.22   | 1.536  |
| C | -3.331 | -2.214 | 2.981  | H | 5.641  | 2.701  | 1.687  |
| H | -5.131 | -1.611 | 1.923  | C | 3.552  | 3.269  | 1.634  |
| H | -3.633 | -1.146 | 1.14   | C | 0.344  | 3.076  | 0.538  |
| H | -3.265 | -3.773 | 0.859  | C | 0.775  | 4.352  | -0.17  |
| H | -5.005 | -3.86  | 1.123  | H | 1.208  | 2.428  | 0.72   |
| H | -5.328 | -2.227 | -0.775 | C | -1.819 | 1.848  | 0.112  |
| H | -3.653 | -3.168 | 3.425  | H | -1.317 | -2.669 | 3.636  |
| H | -3.577 | -1.437 | 3.723  | H | -1.572 | -2.87  | 1.903  |
| H | -5.373 | -1.477 | -2.686 | C | -1.252 | -0.834 | 2.513  |
| H | -4.399 | -0.608 | -3.871 | H | -1.431 | -0.2   | 3.396  |
| C | -5.088 | 0.632  | -2.228 | H | -1.778 | -0.354 | 1.675  |
| C | -5.602 | 0.522  | -0.799 | C | 0.238  | -0.812 | 2.213  |
| C | -3.949 | 2.175  | 1.385  | H | 0.625  | 0.22   | 2.181  |
| C | -4.768 | 2.723  | 0.211  | H | 0.793  | -1.352 | 2.989  |
| H | -4.833 | 0.026  | -0.19  | H | 5.121  | 1.062  | -2.489 |
| H | -6.482 | -0.143 | -0.786 | H | 4.164  | -0.148 | -3.343 |
| H | -5.88  | 1.02   | -2.885 | H | 6.441  | -0.954 | -2.657 |
| H | -4.257 | 1.349  | -2.282 | H | 6.055  | -0.669 | -0.984 |
| N | 0.544  | -1.441 | 0.937  | H | 3.957  | -2.388 | -1.78  |
| C | 5.548  | -3.078 | -0.519 | H | 5.338  | -2.996 | -2.68  |
| N | 3.471  | 0.26   | -1.474 | H | 4.383  | -1.57  | 0.487  |
| N | -0.586 | 2.271  | -0.237 | H | 5.52   | -2.373 | 1.551  |
| O | -0.02  | -0.743 | -0.127 | H | 5.413  | -4.167 | -0.591 |
| O | 1.996  | -2.349 | -0.546 | H | 6.633  | -2.92  | -0.427 |
| O | 2.244  | -0.129 | -2.006 | H | 4.548  | 1.508  | 2.364  |
| O | 2.481  | 0.712  | 0.519  | H | -0.049 | 5.081  | -0.164 |
| O | -0.02  | 1.734  | -1.386 | H | 0.967  | 4.105  | -1.223 |
| O | -2.432 | 0.971  | -0.512 | C | 2.036  | 4.965  | 0.438  |
| C | 1.667  | -2.14  | 0.629  | H | 2.238  | 5.911  | -0.081 |
| C | 2.483  | -2.724 | 1.768  | H | 1.854  | 5.238  | 1.49   |
| H | 1.843  | -3.376 | 2.381  | C | 3.263  | 4.043  | 0.35   |
| H | 2.808  | -1.907 | 2.431  | H | 4.156  | 4.624  | 0.074  |
| C | 3.69   | -3.478 | 1.223  | H | 2.635  | 2.776  | 1.976  |
| H | 3.35   | -4.113 | 0.396  | H | 3.814  | 3.986  | 2.427  |
| H | 4.078  | -4.154 | 1.997  | H | 3.102  | 3.338  | -0.482 |
| C | 4.814  | -2.555 | 0.727  | H | -0.112 | 3.292  | 1.512  |

|   |        |        |        |   |        |        |        |
|---|--------|--------|--------|---|--------|--------|--------|
| C | -2.471 | 2.529  | 1.307  | C | 4.915  | 0.715  | 1.692  |
| H | -4.123 | 2.821  | -0.674 | C | 4.475  | 1.899  | -1.241 |
| H | -5.107 | 3.742  | 0.448  | C | 4.675  | 2.651  | 0.072  |
| C | -5.972 | 1.855  | -0.15  | H | 4.399  | 0.13   | 0.913  |
| H | -6.64  | 2.413  | -0.824 | H | 5.67   | 0.043  | 2.129  |
| H | -6.559 | 1.661  | 0.762  | H | 4.43   | 1.516  | 3.641  |
| H | -4.034 | 1.08   | 1.424  | H | 3.227  | 1.881  | 2.406  |
| H | -4.358 | 2.547  | 2.334  | N | -0.817 | -2.074 | -1.873 |
| H | -2.331 | 3.618  | 1.239  | C | -4.976 | -2.443 | 1.775  |
| H | -1.952 | 2.215  | 2.225  | N | -2.747 | 1.076  | 1.248  |
| C | 5.054  | -2.402 | -1.801 | N | 0.977  | 2.708  | -0.923 |
| C | -1.819 | -2.226 | 2.761  | O | -0.029 | -0.973 | -1.74  |
| H | 1.982  | -0.957 | -1.512 | O | -1.455 | -1.786 | 0.251  |
| H | -2.033 | 0.14   | -1.989 | O | -1.542 | 0.599  | 1.671  |
| H | 0.493  | 0.942  | -1.087 | O | -2.104 | 0.624  | -0.851 |
| H | -0.77  | -1.314 | -0.462 | O | -0.092 | 2.147  | -0.314 |

**Table S6-B: Zr-C7**

| Atom | Coordinates (Angstroms) |        |        | Atom | X      | Y      | Z      |
|------|-------------------------|--------|--------|------|--------|--------|--------|
|      | X                       | Y      | Z      |      |        |        |        |
| ZR   | -0.1                    | 0.038  | 0.172  | C    | -1.522 | -2.467 | -0.813 |
| C    | 2.149                   | -1.595 | 1.454  | C    | -2.415 | -3.684 | -0.863 |
| O    | 1.226                   | -1.757 | 0.602  | H    | -1.786 | -4.587 | -0.907 |
| O    | 1.104                   | 0.375  | 1.964  | H    | -3.007 | -3.683 | -1.79  |
| N    | 2.123                   | -0.49  | 2.19   | C    | -3.324 | -3.738 | 0.359  |
| C    | 3.053                   | -0.075 | 3.223  | H    | -2.703 | -3.584 | 1.251  |
| C    | 3.222                   | -2.641 | 1.635  | H    | -3.752 | -4.747 | 0.448  |
| H    | 3.187                   | -3.02  | 2.667  | C    | -4.46  | -2.712 | 0.357  |
| C    | 3.054                   | -3.788 | 0.648  | C    | -4.768 | 0.046  | 2.212  |
| C    | 3.359                   | -3.429 | -0.805 | C    | -3.766 | 1.191  | 2.285  |
| C    | 2.791                   | -4.471 | -1.77  | C    | -2.974 | 1.095  | -0.07  |
| H    | 4.448                   | -3.341 | -0.935 | C    | -4.191 | 1.789  | -0.617 |
| H    | 2.935                   | -2.441 | -1.041 | H    | -4.615 | 2.455  | 0.146  |
| H    | 2.023                   | -4.158 | 0.725  | H    | -4.973 | 1.047  | -0.84  |
| H    | 3.703                   | -4.621 | 0.958  | C    | -3.874 | 2.573  | -1.897 |
| H    | 4.214                   | -2.177 | 1.522  | H    | -4.756 | 3.19   | -2.129 |
| H    | 3.015                   | -5.476 | -1.38  | C    | -2.62  | 3.446  | -1.845 |
| H    | 3.301                   | -4.408 | -2.743 | C    | 0.703  | 4.057  | -1.407 |
| H    | 3.675                   | -0.94  | 3.487  | C    | 0.008  | 4.918  | -0.341 |
| H    | 2.45                    | 0.192  | 4.1    | H    | 1.654  | 4.499  | -1.718 |
| C    | 3.908                   | 1.098  | 2.768  | C    | 1.984  | 1.881  | -1.206 |
|      |                         |        |        | H    | 0.825  | -5.277 | -2.247 |
|      |                         |        |        | H    | 0.82   | -3.997 | -1.034 |
|      |                         |        |        | C    | 0.951  | -3.285 | -3.061 |
|      |                         |        |        | H    | 1.198  | -3.69  | -4.053 |
|      |                         |        |        | H    | 1.562  | -2.383 | -2.922 |

|   |        |        |        |
|---|--------|--------|--------|
| C | -0.509 | -2.846 | -3.065 |
| H | -0.72  | -2.209 | -3.934 |
| H | -1.19  | -3.706 | -3.1   |
| H | -4.271 | 2.164  | 2.192  |
| H | -3.213 | 1.196  | 3.229  |
| H | -5.592 | 0.24   | 2.917  |
| H | -5.231 | 0.063  | 1.212  |
| H | -3.132 | -1.367 | 2.101  |
| H | -4.112 | -1.51  | 3.553  |
| H | -4.102 | -1.765 | -0.08  |
| H | -5.269 | -3.066 | -0.299 |
| H | -4.929 | -3.379 | 2.352  |
| H | -6.039 | -2.16  | 1.755  |
| H | -3.765 | 1.863  | -2.727 |
| H | 0.634  | 5.8    | -0.148 |
| H | -0.024 | 4.349  | 0.595  |
| C | -1.401 | 5.405  | -0.686 |
| H | -1.643 | 6.21   | 0.023  |
| H | -1.391 | 5.886  | -1.679 |
| C | -2.533 | 4.375  | -0.638 |
| H | -3.487 | 4.921  | -0.542 |
| H | -1.744 | 2.788  | -1.86  |
| H | -2.586 | 4.05   | -2.766 |
| H | -2.427 | 3.777  | 0.281  |
| H | 0.075  | 3.973  | -2.307 |
| C | 3.202  | 2.323  | -1.967 |
| H | 3.694  | 2.806  | 0.553  |
| H | 5.062  | 3.659  | -0.138 |
| C | 5.595  | 1.919  | 1.044  |
| H | 5.939  | 2.607  | 1.831  |
| H | 6.5    | 1.595  | 0.509  |
| H | 4.412  | 0.818  | -1.058 |
| H | 5.342  | 2.054  | -1.898 |
| H | 3.204  | 3.405  | -2.138 |
| H | 3.158  | 1.847  | -2.957 |
| C | -4.169 | -1.339 | 2.469  |
| C | 1.283  | -4.311 | -1.984 |

**Table S7-A: L7**

| Atom | Coordinates (Angstroms) |        |        |
|------|-------------------------|--------|--------|
|      | X                       | Y      | Z      |
| C    | 3.006                   | -1.969 | 0.866  |
| O    | 1.958                   | -2.221 | 0.252  |
| O    | 1.793                   | -0.881 | 2.543  |
| N    | 3.021                   | -1.27  | 2.022  |
| C    | 4.17                    | -0.809 | 2.79   |
| C    | 4.333                   | -2.474 | 0.326  |
| H    | 4.554                   | -3.437 | 0.809  |
| C    | 4.253                   | -2.63  | -1.185 |
| C    | 4.077                   | -1.286 | -1.894 |
| C    | 3.335                   | -1.391 | -3.224 |
| H    | 5.063                   | -0.822 | -2.05  |
| H    | 3.531                   | -0.598 | -1.229 |
| H    | 3.404                   | -3.287 | -1.416 |
| H    | 5.155                   | -3.139 | -1.553 |
| H    | 5.16                    | -1.803 | 0.598  |
| H    | 3.762                   | -2.22  | -3.809 |
| H    | 3.51                    | -0.48  | -3.82  |
| H    | 3.835                   | 0.109  | 3.286  |
| H    | 4.972                   | -0.52  | 2.099  |
| C    | 4.667                   | -1.826 | 3.808  |
| C    | 6.165                   | 1.907  | -1.662 |
| C    | 3.159                   | 2.564  | -1.368 |
| C    | 4.238                   | 2.986  | -0.365 |
| H    | 6.486                   | 2.905  | -2.001 |
| C    | 7.367                   | 0.982  | -1.572 |
| H    | 5.53                    | -1.388 | 4.331  |
| H    | 5.053                   | -2.709 | 3.274  |
| N    | -0.684                  | -1.274 | -1.212 |
| C    | -5.685                  | -3.237 | -0.216 |
| N    | -3.802                  | 0.103  | 1.146  |
| N    | 0.197                   | 2.19   | 0.905  |
| O    | -0.2                    | -0.679 | -0.047 |
| O    | -2.161                  | -2.386 | 0.096  |
| O    | -2.548                  | -0.259 | 1.632  |
| O    | -2.904                  | 0.644  | -0.876 |
| O    | -0.134                  | 1.348  | 1.965  |
| O    | 2.158                   | 1.066  | 0.689  |
| C    | -1.782                  | -2.053 | -1.035 |
| C    | -2.506                  | -2.57  | -2.265 |

|   |        |        |        |   |        |        |        |
|---|--------|--------|--------|---|--------|--------|--------|
| H | -1.801 | -3.136 | -2.892 | C | -3.931 | 3.826  | 0.535  |
| H | -2.834 | -1.713 | -2.873 | H | -4.872 | 4.338  | 0.793  |
| C | -3.704 | -3.422 | -1.859 | H | -2.964 | 3.098  | -1.252 |
| H | -3.383 | -4.104 | -1.062 | H | -4.071 | 4.426  | -1.524 |
| H | -4.006 | -4.051 | -2.707 | H | -3.928 | 2.899  | 1.133  |
| C | -4.904 | -2.595 | -1.372 | H | -1.678 | 2.228  | 0.05   |
| C | -5.87  | -1.286 | 1.409  | C | 1.738  | 2.828  | -0.893 |
| C | -4.924 | -0.254 | 2.016  | H | 3.805  | 3.026  | 0.643  |
| C | -3.872 | 0.632  | -0.11  | H | 4.584  | 4.007  | -0.592 |
| C | -5.193 | 1.267  | -0.502 | C | 5.425  | 2.033  | -0.338 |
| H | -5.775 | 1.528  | 0.392  | H | 5.056  | 1.037  | -0.037 |
| H | -5.793 | 0.523  | -1.046 | H | 6.135  | 2.345  | 0.444  |
| C | -5.014 | 2.497  | -1.399 | H | 3.255  | 1.487  | -1.564 |
| H | -5.993 | 2.995  | -1.458 | H | 3.31   | 3.062  | -2.336 |
| C | -3.943 | 3.493  | -0.955 | H | 1.603  | 3.887  | -0.625 |
| C | -0.934 | 2.956  | 0.405  | H | 1.022  | 2.63   | -1.706 |
| C | -1.525 | 3.884  | 1.456  | C | -5.263 | -2.673 | 1.144  |
| H | -0.596 | 3.524  | -0.469 | C | 1.828  | -1.593 | -3.061 |
| C | 1.381  | 1.942  | 0.291  | C | 3.599  | -2.246 | 4.802  |
| H | 1.394  | -1.926 | -4.017 | H | 5.473  | 1.537  | -2.436 |
| H | 1.632  | -2.394 | -2.333 | H | 3.99   | -2.972 | 5.524  |
| C | 1.118  | -0.324 | -2.606 | H | 2.741  | -2.7   | 4.294  |
| H | 1.275  | 0.472  | -3.352 | H | 3.218  | -1.383 | 5.363  |
| H | 1.562  | 0.041  | -1.669 | H | 7.07   | -0.02  | -1.231 |
| C | -0.378 | -0.475 | -2.391 | H | 8.105  | 1.361  | -0.852 |
| H | -0.861 | 0.507  | -2.261 | H | 7.874  | 0.865  | -2.536 |
| H | -0.845 | -0.964 | -3.253 | H | 1.592  | -0.04  | 2.053  |
| H | -5.475 | 0.658  | 2.291  | H | -0.788 | 0.707  | 1.589  |
| H | -4.457 | -0.631 | 2.93   | H | 0.582  | -1.244 | 0.22   |
| H | -6.742 | -1.37  | 2.073  | H | -2.256 | -1.058 | 1.102  |
| H | -6.271 | -0.879 | 0.47   |   |        |        |        |
| H | -4.166 | -2.621 | 1.166  |   |        |        |        |
| H | -5.553 | -3.36  | 1.951  |   |        |        |        |
| H | -4.54  | -1.61  | -1.04  |   |        |        |        |
| H | -5.568 | -2.388 | -2.225 |   |        |        |        |
| H | -5.534 | -4.326 | -0.236 |   |        |        |        |
| H | -6.767 | -3.085 | -0.346 |   |        |        |        |
| H | -4.776 | 2.167  | -2.418 |   |        |        |        |
| H | -0.741 | 4.572  | 1.806  |   |        |        |        |
| H | -1.814 | 3.279  | 2.327  |   |        |        |        |
| C | -2.733 | 4.681  | 0.967  |   |        |        |        |
| H | -3.034 | 5.355  | 1.78   |   |        |        |        |
| H | -2.435 | 5.338  | 0.133  |   |        |        |        |

**Table S7-B: Zr-L7**

| Atom | Coordinates (Angstroms) |        |        |
|------|-------------------------|--------|--------|
|      | X                       | Y      | Z      |
| ZR   | -0.355                  | 0.101  | -0.036 |
| C    | 2.139                   | -1.002 | 1.365  |
| O    | 1.29                    | -1.361 | 0.494  |
| O    | 0.755                   | 0.782  | 1.734  |
| N    | 1.911                   | 0.133  | 2.02   |
| C    | 2.637                   | 0.634  | 3.174  |



|   |        |        |        |   |        |        |        |
|---|--------|--------|--------|---|--------|--------|--------|
| C | 3.35   | -1.852 | 1.656  | C | -4.688 | 1.055  | -0.782 |
| H | 3.283  | -2.233 | 2.687  | H | -5.244 | 1.575  | 0.009  |
| C | 3.463  | -3.012 | 0.676  | H | -5.308 | 0.192  | -1.071 |
| C | 3.772  | -2.602 | -0.763 | C | -4.515 | 1.971  | -2.002 |
| C | 3.475  | -3.737 | -1.744 | H | -5.499 | 2.416  | -2.215 |
| H | 4.829  | -2.301 | -0.836 | C | -3.458 | 3.069  | -1.869 |
| H | 3.176  | -1.718 | -1.036 | C | -0.266 | 4.313  | -1.245 |
| H | 2.518  | -3.572 | 0.7    | C | -1.174 | 4.924  | -0.166 |
| H | 4.24   | -3.704 | 1.031  | H | 0.61   | 4.94   | -1.441 |
| H | 4.261  | -1.235 | 1.63   | C | 1.369  | 2.398  | -1.176 |
| H | 3.875  | -4.676 | -1.333 | H | 1.737  | -4.923 | -2.304 |
| H | 4.011  | -3.573 | -2.691 | H | 1.414  | -3.663 | -1.114 |
| H | 2.608  | 1.729  | 3.1    | C | 1.5    | -2.953 | -3.143 |
| H | 3.683  | 0.32   | 3.072  | H | 1.884  | -3.299 | -4.114 |
| C | 2.064  | 0.162  | 4.506  | H | 1.899  | -1.941 | -2.985 |
| C | 6.492  | 1.411  | -0.194 | C | -0.017 | -2.832 | -3.234 |
| C | 3.847  | 2.474  | -1.421 | H | -0.308 | -2.261 | -4.125 |
| C | 4.142  | 2.407  | 0.076  | H | -0.498 | -3.817 | -3.289 |
| H | 6.927  | 2.393  | 0.053  | H | -4.866 | 1.26   | 2.028  |
| C | 7.43   | 0.303  | 0.252  | H | -3.644 | 0.487  | 3.048  |
| H | 2.731  | 0.536  | 5.297  | H | -5.786 | -0.912 | 2.658  |
| H | 2.129  | -0.936 | 4.55   | H | -5.363 | -0.962 | 0.958  |
| N | -0.548 | -2.134 | -2.077 | H | -3.039 | -1.964 | 1.853  |
| C | -4.62  | -3.387 | 1.481  | H | -3.984 | -2.335 | 3.289  |
| N | -3.148 | 0.532  | 1.069  | H | -3.867 | -2.53  | -0.353 |
| N | 0.217  | 2.993  | -0.864 | H | -4.723 | -4.051 | -0.598 |
| O | -0.031 | -0.883 | -1.931 | H | -4.408 | -4.303 | 2.052  |
| O | -1.311 | -1.97  | 0.017  | H | -5.718 | -3.317 | 1.432  |
| O | -1.875 | 0.29   | 1.49   | H | -4.259 | 1.352  | -2.872 |
| O | -2.419 | 0.315  | -1.04  | H | -0.758 | 5.899  | 0.119  |
| O | -0.776 | 2.175  | -0.449 | H | -1.118 | 4.29   | 0.728  |
| O | 1.463  | 1.149  | -0.99  | C | -2.642 | 5.136  | -0.548 |
| C | -1.188 | -2.661 | -1.034 | H | -3.061 | 5.836  | 0.189  |
| C | -1.791 | -4.045 | -1.093 | H | -2.696 | 5.665  | -1.515 |
| H | -0.98  | -4.788 | -1.114 | C | -3.552 | 3.903  | -0.596 |
| H | -2.345 | -4.178 | -2.034 | H | -4.594 | 4.246  | -0.474 |
| C | -2.696 | -4.292 | 0.109  | H | -2.467 | 2.604  | -1.923 |
| H | -2.143 | -4.008 | 1.014  | H | -3.55  | 3.735  | -2.742 |
| H | -2.899 | -5.369 | 0.193  | H | -3.334 | 3.269  | 0.279  |
| C | -4.025 | -3.533 | 0.077  | H | -0.811 | 4.211  | -2.197 |
| C | -4.927 | -0.915 | 1.969  | C | 2.533  | 3.182  | -1.723 |
| C | -4.177 | 0.405  | 2.095  | H | 3.199  | 2.237  | 0.617  |
| C | -3.368 | 0.574  | -0.249 | H | 4.528  | 3.379  | 0.425  |

|   |        |        |        |   |        |        |        |
|---|--------|--------|--------|---|--------|--------|--------|
| C | 5.113  | 1.296  | 0.442  | C | 0.636  | 0.61   | 4.769  |
| H | 4.661  | 0.336  | 0.142  | H | 6.395  | 1.394  | -1.29  |
| H | 5.229  | 1.249  | 1.537  | H | 0.305  | 0.286  | 5.763  |
| H | 3.79   | 1.453  | -1.824 | H | -0.058 | 0.213  | 4.022  |
| H | 4.663  | 2.981  | -1.955 | H | 0.552  | 1.704  | 4.724  |
| H | 2.541  | 4.197  | -1.304 | H | 7.025  | -0.685 | -0.004 |
| H | 2.402  | 3.3    | -2.81  | H | 7.576  | 0.321  | 1.34   |
| C | -4.063 | -2.156 | 2.207  | H | 8.419  | 0.384  | -0.215 |
| C | 1.978  | -3.883 | -2.035 |   |        |        |        |

---

**Table S7-B:** Zr(OH)<sub>4</sub>

| Atom | Coordinates (Angstroms) |        |       |
|------|-------------------------|--------|-------|
|      | X                       | Y      | Z     |
| ZR   | 15.949                  | 1.757  | 2.34  |
| H    | 18.752                  | 2.029  | 2.583 |
| O    | 17.899                  | 1.914  | 2.157 |
| O    | 15.483                  | 1.537  | 4.236 |
| H    | 14.94                   | 1.81   | 4.979 |
| O    | 15.319                  | 0.195  | 1.328 |
| H    | 15.538                  | -0.607 | 0.848 |
| O    | 15.097                  | 3.382  | 1.637 |
| H    | 14.571                  | 3.794  | 0.946 |
